# Supplementary material for: Synthesis, characterization and cytotoxicity of arene–ruthenium(ii) complexes with acylpyrazolones functionalized with aromatic groups in the acyl moiety
Source: Royal Society of Chemistry journal article supplement (doi:10.1039/c7dt04249c), 2017-12-19
Supplement: c7dt04249c1.pdf [file c7dt04249c1.pdf]

## SUPPORTING INFORMATIONS

# Synthesis, Characterization and Cytotoxicity of Arene-Ruthenium(II) Complexes with Acylpyrazolones Functionalized with Aromatic Groups in the Acyl Moiety

Fabio Marchetti,<sup>a\*</sup> Riccardo Pettinari,<sup>b\*</sup> Corrado Di Nicola,<sup>a</sup> Claudio Pettinari,<sup>b</sup> Jessica Palmucci,<sup>a</sup> Rosario Scopelliti,<sup>c</sup> Tina Riedel,<sup>c</sup> Bruno Therrien,<sup>d</sup> Agustín Galindo,<sup>e</sup> and Paul J. Dyson.<sup>c</sup>

---

[a] School of Science and Technology, University of Camerino, Via S. Agostino 1, 62032 Camerino (MC), Italy  
E-mail: fabio.marchetti@unicam.it

[b] School of Pharmacy, University of Camerino,  
Via S. Agostino 1, 62032 Camerino (MC), Italy  
E-mail: riccardo.pettinari@unicam.it

[c] Institut des Sciences et Ingénierie Chimiques, Ecole Polytechnique Fédérale de Lausanne (EPFL), 1015 Lausanne, Switzerland  
E-mail: paul.dyson@epfl.ch

[d] Institut de Chimie, Université de Neuchâtel,  
Avenue de Belleaux 51, CH-2000 Neuchâtel, Switzerland

[e] Departamento de Química Inorgánica, Facultad de Química, Universidad de Sevilla, Apto 1203, 41071 Sevilla, Spain

**Supporting Information**

**Table S1.** Geometrical parameters for complexes **1** – **4** and **6**.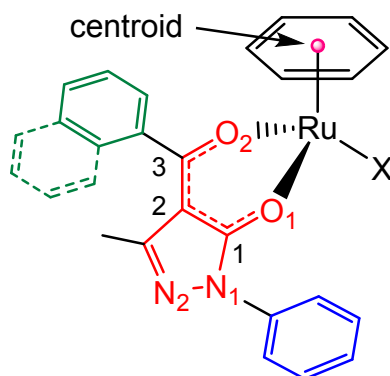

|                                                                                                                                  | <b>1</b>   | <b>2</b>   | <b>3</b>   | <b>4</b>  | <b>6</b>   |
|----------------------------------------------------------------------------------------------------------------------------------|------------|------------|------------|-----------|------------|
| <b>Distances (Å)</b>                                                                                                             |            |            |            |           |            |
| Ru-O1                                                                                                                            | 2.0885(10) | 2.097(5)   | 2.0951(17) | 2.118(7)  | 2.108(2)   |
| Ru-O2                                                                                                                            | 2.0935(9)  | 2.114(5)   | 2.0915(16) | 2.124(7)  | 2.106(3)   |
| Ru-X                                                                                                                             | 2.4087(4)  | 2.4088(19) | 2.4069(7)  | 2.423(3)  | 2.3226(11) |
| N1-N2                                                                                                                            | 1.4042(17) | 1.403(8)   | 1.409(3)   | 1.435(12) | 1.402(4)   |
| C1-O1                                                                                                                            | 1.2698(16) | 1.270(9)   | 1.268(3)   | 1.278(13) | 1.276(4)   |
| C3-O2                                                                                                                            | 1.2673(17) | 1.277(8)   | 1.275(3)   | 1.275(13) | 1.289(4)   |
| C1-C2                                                                                                                            | 1.4314(19) | 1.422(10)  | 1.427(3)   | 1.448(15) | 1.430(5)   |
| C2-C3                                                                                                                            | 1.404(2)   | 1.426(10)  | 1.406(4)   | 1.395(15) | 1.404(5)   |
| Ru-centroid                                                                                                                      | 1.65       | 1.65       | 1.64       | 1.65      | 1.71       |
| <b>Angles (°)</b>                                                                                                                |            |            |            |           |            |
| O1-Ru-O2                                                                                                                         | 89.05(4)   | 88.99(18)  | 87.95(7)   | 87.8(3)   | 87.95(9)   |
| O1-Ru-X                                                                                                                          | 84.84(3)   | 83.71(14)  | 85.45(6)   | 85.0(2)   | 87.86(8)   |
| O2-Ru-X                                                                                                                          | 83.93(3)   | 82.89(14)  | 84.88(6)   | 84.9(2)   | 83.84(8)   |
| <b>Angles between the acylpyrazolone plane and the N<sub>phenyl</sub>, C<sub>phenyl</sub> and C<sub>naphthyl</sub> plane (°)</b> |            |            |            |           |            |
| N <sub>ph</sub>                                                                                                                  | 21.04      | 36.05      | 20.16      | 20.85     | 8.03       |
| C <sub>ph</sub>                                                                                                                  | 66.17      |            | 60.18      |           | 61.95      |
| C <sub>naph</sub>                                                                                                                |            | 82.17      |            | 83.76     |            |

**Table S2:** Crystallographic and structure refinement parameters for compounds **1** – **4** and **6**.

|                                            | <b>1</b>                                                           | <b>2</b>                                                           | <b>3</b>                                                           | <b>4</b>                                                           | <b>6</b>                                                                                       |
|--------------------------------------------|--------------------------------------------------------------------|--------------------------------------------------------------------|--------------------------------------------------------------------|--------------------------------------------------------------------|------------------------------------------------------------------------------------------------|
| Chemical formula                           | C <sub>27</sub> H <sub>27</sub> ClN <sub>2</sub> O <sub>2</sub> Ru | C <sub>31</sub> H <sub>29</sub> ClN <sub>2</sub> O <sub>2</sub> Ru | C <sub>29</sub> H <sub>31</sub> ClN <sub>2</sub> O <sub>2</sub> Ru | C <sub>33</sub> H <sub>33</sub> ClN <sub>2</sub> O <sub>2</sub> Ru | C <sub>37</sub> H <sub>41</sub> F <sub>6</sub> N <sub>5</sub> O <sub>2</sub> P <sub>2</sub> Ru |
| Formula weight                             | 548.02                                                             | 598.08                                                             | 576.08                                                             | 626.13                                                             | 864.76                                                                                         |
| Crystal system                             | Monoclinic                                                         | Monoclinic                                                         | Monoclinic                                                         | Orthorhombic                                                       | Triclinic                                                                                      |
| Space group                                | <i>P2<sub>1</sub>/n</i> (no. 14)                                   | <i>P2<sub>1</sub>/c</i> (no. 14)                                   | <i>P2<sub>1</sub>/c</i> (no. 14)                                   | <i>Pbca</i> (no. 61)                                               | <i>P</i> -1 (no. 2)                                                                            |
| Crystal color and shape                    | orange block                                                       | orange prism                                                       | orange block                                                       | orange prism                                                       | orange prism                                                                                   |
| Crystal size                               | 0.25 x 0.21 x 0.17                                                 | 0.35 x 0.21 x 0.18                                                 | 0.19 x 0.18 x 0.15                                                 | 0.26 x 0.14 x 0.13                                                 | 0.47 x 0.21 x 0.18                                                                             |
| <i>a</i> (Å)                               | 16.4494(7)                                                         | 9.9327(18)                                                         | 8.1807(7)                                                          | 13.815(2)                                                          | 10.5733(8)                                                                                     |
| <i>b</i> (Å)                               | 8.1443(2)                                                          | 27.560(4)                                                          | 16.3923(18)                                                        | 15.2054(13)                                                        | 11.3341(13)                                                                                    |
| <i>c</i> (Å)                               | 17.6939(8)                                                         | 10.059(2)                                                          | 19.3118(18)                                                        | 29.897(4)                                                          | 16.2898(16)                                                                                    |
| $\alpha$ (°)                               | 90                                                                 | 90                                                                 | 90                                                                 | 90                                                                 | 97.731(9)                                                                                      |
| $\beta$ (°)                                | 92.101(3)                                                          | 106.967(14)                                                        | 96.340(7)                                                          | 90                                                                 | 106.620(7)                                                                                     |
| $\gamma$ (°)                               | 90                                                                 | 90                                                                 | 90                                                                 | 90                                                                 | 100.180(9)                                                                                     |
| <i>V</i> (Å <sup>3</sup> )                 | 2368.8(2)                                                          | 2633.8(9)                                                          | 2573.9(4)                                                          | 6280.2(14)                                                         | 1805.3(3)                                                                                      |
| <i>Z</i>                                   | 4                                                                  | 4                                                                  | 4                                                                  | 8                                                                  | 2                                                                                              |
| <i>D<sub>c</sub></i> (g.cm <sup>-3</sup> ) | 1.537                                                              | 1.508                                                              | 1.487                                                              | 1.324                                                              | 1.591                                                                                          |
| $\mu$ (mm <sup>-1</sup> )                  | 0.802                                                              | 0.729                                                              | 0.742                                                              | 0.614                                                              | 0.596                                                                                          |
| Scan range (°)                             | 1.66 < $\theta$ < 29.23                                            | 2.27 < $\theta$ < 25.44                                            | 1.63 < $\theta$ < 29.24                                            | 2.41 < $\theta$ < 25.21                                            | 2.49 < $\theta$ < 27.50                                                                        |
| Unique reflections                         | 6423 [R <sub>int</sub> = 0.0423]                                   | 4848 [R <sub>int</sub> = 0.1330]                                   | 6987 [R <sub>int</sub> = 0.0842]                                   | 5659 [R <sub>int</sub> = 0.1384]                                   | 8225 [R <sub>int</sub> = 0.0471]                                                               |
| Final R indices [I > 2 $\sigma$ (I)]*      | 0.0217, wR <sub>2</sub> 0.0499                                     | 0.0718, wR <sub>2</sub> 0.1424                                     | 0.0369, wR <sub>2</sub> 0.0572                                     | 0.1083, wR <sub>2</sub> 0.2212                                     | 0.0537, wR <sub>2</sub> 0.1028                                                                 |
| R indices (all data)                       | 0.0291, wR <sub>2</sub> 0.0517                                     | 0.1237, wR <sub>2</sub> 0.1678                                     | 0.0732, wR <sub>2</sub> 0.0629                                     | 0.1419, wR <sub>2</sub> 0.2338                                     | 0.0816, wR <sub>2</sub> 0.1162                                                                 |
| Goodness-of-fit                            | 1.030                                                              | 1.089                                                              | 0.877                                                              | 1.260                                                              | 1.109                                                                                          |
| Max, Min $\Delta\rho/e$ (Å <sup>-3</sup> ) | 0.359, -0.521                                                      | 1.702, -2.096                                                      | 0.601, -0.657                                                      | 1.444, -1.305                                                      | 1.545, -0.937                                                                                  |

\* Structures were refined on F<sub>0</sub><sup>2</sup>: wR<sub>2</sub> = [Σ[w(F<sub>0</sub><sup>2</sup> - F<sub>c</sub><sup>2</sup>)] / Σw(F<sub>0</sub><sup>2</sup>)<sup>1/2</sup>, where w<sup>-1</sup> = [Σ(F<sub>0</sub><sup>2</sup>) + (aP)<sup>2</sup> + bP] and P = [max(F<sub>0</sub><sup>2</sup>, 0) + 2F<sub>c</sub><sup>2</sup>]/3

**Table S3.** Comparison of selected computed and experimental structural parameters for compounds **1** – **4** and **6**.

| <b>Bond distances<br/>(Å) and angles (°)</b> | <b>1</b>             | <b>1c</b>      | <b>2</b>             | <b>2c</b>      | <b>3</b>             | <b>3c</b>      | <b>4</b>             | <b>4c</b>      | <b>6</b>             | <b>6c</b>      |
|----------------------------------------------|----------------------|----------------|----------------------|----------------|----------------------|----------------|----------------------|----------------|----------------------|----------------|
| Ru-centroid                                  | 1.647                | 1.739          | 1.651                | 1.739          | 1.643                | 1.731          | 1.646                | 1.731          | 1.710                | 1.819          |
| Ru-O                                         | 2.089(1)<br>2.094(1) | 2.101<br>2.103 | 2.097(5)<br>2.114(5) | 2.098<br>2.099 | 2.095(2)<br>2.092(2) | 2.111<br>2.113 | 2.118(7)<br>2.124(7) | 2.110<br>2.111 | 2.106(3)<br>2.108(2) | 2.103<br>2.106 |
| Ru-Cl                                        | 2.4087(4)            | 2.434          | 2.409(2)             | 2.442          | 2.4069(7)            | 2.447          | 2.423(3)             | 2.451          | -                    | -              |
| Ru-P                                         | -                    | -              | -                    | -              | -                    | -              | -                    | -              | 2.323(1)             | 2.350          |
| N1-N2                                        | 1.404(2)             | 1.392          | 1.403(8)             | 1.394          | 1.409(3)             | 1.392          | 1.435(12)            | 1.393          | 1.402(4)             | 1.394          |
| O1-C (acyl)                                  | 1.267(2)             | 1.277          | 1.277(8)             | 1.277          | 1.275(3)             | 1.274          | 1.275(13)            | 1.276          | 1.289(4)             | 1.287          |
| O2-C                                         | 1.270(2)             | 1.277          | 1.270(9)             | 1.275          | 1.268(3)             | 1.274          | 1.278(13)            | 1.275          | 1.276(4)             | 1.285          |
| O-Ru-O                                       | 89.05(4)             | 87.8           | 89.0(2)              | 88.5           | 87.95(7)             | 88.4           | 87.8(3)              | 88.3           | 88.0(1)              | 88.7           |
| Cl-Ru-O                                      | 83.93(3)<br>84.84(3) | 86.0<br>86.7   | 82.9(1)<br>83.7(1)   | 85.5<br>86.3   | 84.88(6)<br>85.45(6) | 85.6<br>85.9   | 84.9(2)<br>85.0(2)   | 85.7<br>86.5   | -                    | -              |
| P-Ru-O                                       | -                    | -              | -                    | -              | -                    | -              | -                    | -              | 83.84(8)<br>87.86(8) | 83.7<br>87.0   |

**Table S4.** Comparison of selected experimental and calculated IR absorptions of complexes **1-4** (cm<sup>-1</sup>).

| <b>1</b>            |                               | <b>2</b>            |                               | <b>3</b>            |                               | <b>4</b>            |                               | <b>Assignment<sup>b</sup></b>                                                                                    |
|---------------------|-------------------------------|---------------------|-------------------------------|---------------------|-------------------------------|---------------------|-------------------------------|------------------------------------------------------------------------------------------------------------------|
| <b>Experimental</b> | <b>Calculated<sup>a</sup></b> | <b>Experimental</b> | <b>Calculated<sup>a</sup></b> | <b>Experimental</b> | <b>Calculated<sup>a</sup></b> | <b>Experimental</b> | <b>Calculated<sup>a</sup></b> |                                                                                                                  |
| 1599s               | 1598                          | 1604s               | 1598                          | 1605s               | 1599                          | 1604s               | 1598                          | ν(C <sup>≡</sup> O)<br>symmetrical (both<br>C <sup>≡</sup> O of Q <sup>R</sup> ) +<br>ν(C <sup>≡</sup> C) phenyl |
| 1591m               | 1583                          | 1592s               | 1583                          | 1591s               | 1583                          | 1591v               | 1583                          |                                                                                                                  |
| 1575vs              | 1562                          | 1577vs              | 1570                          | 1572vs              | 1567                          | 1578vs              | 1569                          |                                                                                                                  |
| 1539s               | 1539                          | 1533m               | 1542                          | 1539s               | 1541                          | 1542m               | 1539                          | ν(C=N), Q <sup>R</sup>                                                                                           |
| 1476vs              | 1465                          | 1482vs              | 1474                          | 1473vs              | 1467                          | 1483vs              | 1472                          | ν(C <sup>≡</sup> C), Q <sup>R</sup>                                                                              |
| 1456vs              |                               | 1459s               |                               | 1458vs              | 1461                          | 1462m               |                               |                                                                                                                  |
| 1374vs              | 1365                          | 1373s               | 1367                          | 1369vs br           | 1367                          | 1371vs              | 1368                          | ν(C <sup>≡</sup> N), Q <sup>R</sup>                                                                              |
| 1360m               |                               | 1360m               |                               |                     |                               | 1360m               |                               |                                                                                                                  |
| 453m                | 445                           | 443w                | 435                           | 460m                | 440                           | 462m                | 435                           | ν(Ru-O)                                                                                                          |
| 445sh               |                               |                     |                               | 445m                |                               | 441w                |                               |                                                                                                                  |
| 279s                | 267                           | 279s                | 263                           | 285s                | 274                           | 287s                | 277                           | ν(Ru-Cl)                                                                                                         |
|                     |                               |                     |                               | 280sh               |                               |                     |                               |                                                                                                                  |

<sup>a</sup> The computed IR spectrum was scaled by a factor of 0.96, according to references 34 and 35 in the manuscript. <sup>b</sup> Due to the absence of symmetry, only the main vibrational modes were included in the assignment.

**Table S5.** Comparison of selected experimental and calculated IR absorptions of complexes **5-8** (cm<sup>-1</sup>).

| <b>5</b>            |                               | <b>6</b>            |                               | <b>7</b>            |                               | <b>8</b>            |                               | <b>Assignment<sup>b</sup></b>                                                                                                                |       |
|---------------------|-------------------------------|---------------------|-------------------------------|---------------------|-------------------------------|---------------------|-------------------------------|----------------------------------------------------------------------------------------------------------------------------------------------|-------|
| <b>Experimental</b> | <b>Calculated<sup>a</sup></b> | <b>Experimental</b> | <b>Calculated<sup>a</sup></b> | <b>Experimental</b> | <b>Calculated<sup>a</sup></b> | <b>Experimental</b> | <b>Calculated<sup>a</sup></b> |                                                                                                                                              |       |
| 1604m               | 1593                          | 1599w               | 1594                          | 1592w               | 1582                          | 1600m               | 1593                          | ν(C <sup>≡</sup> O)<br>symmetrical (both<br>C <sup>≡</sup> O of Q <sup>R</sup> ) +<br>ν(C=N), Q <sup>R</sup> + ν(C <sup>≡</sup> C)<br>phenyl |       |
| 1594m               | 1583                          | 1591m               | 1583                          | 1566s               | 1541                          | 1571s               | 1547                          |                                                                                                                                              |       |
| 1573s               | 1571                          | 1567s               | 1548                          | 1531w               | 1538                          | 1529w               | 1542                          |                                                                                                                                              |       |
| 1542m               | 1541                          | 1536m               | 1542                          |                     |                               |                     |                               |                                                                                                                                              |       |
|                     | 1539                          |                     |                               |                     |                               |                     |                               |                                                                                                                                              |       |
| 1474s               | 1480                          | 1479s               | 1466                          | 1492w               | 1481 w                        | 1478s               | 1466                          | ν(C <sup>≡</sup> C), Q <sup>R</sup>                                                                                                          |       |
| 1460m               | 1459                          | 1459m               |                               | 1471m               |                               | 1448                |                               |                                                                                                                                              | 1458m |
|                     |                               |                     |                               | 1457m               |                               |                     |                               |                                                                                                                                              |       |
|                     |                               |                     |                               | 1440m               |                               |                     |                               |                                                                                                                                              |       |
| 1377s               | 1391                          | 1392m               | 1392                          | 1379m               | 1392                          | 1393w               | 1394                          | ν(C <sup>≡</sup> N), Q <sup>R</sup>                                                                                                          |       |
|                     |                               | 1374m               |                               |                     |                               | 1377m               |                               |                                                                                                                                              |       |
| 1359w               | 1366                          | 1361w               | 1366                          | 1361w               | 1367                          | 1359w               | 1365                          | ν(C <sup>≡</sup> O)<br>asymmetrical (both<br>C <sup>≡</sup> O of Q <sup>R</sup> )                                                            |       |
| 481m                | 460                           | 451m                | 459                           | 477m                | 453                           | 455m                | 455                           | ν(Ru-P)                                                                                                                                      |       |
| 455sh               | 454                           | 478m                | 470                           | 453m                | 448                           | 475m                | 464                           | ν(Ru-O)                                                                                                                                      |       |
| 449m                | 441                           | 440w                | 449                           |                     | 438                           |                     | 442                           |                                                                                                                                              |       |

<sup>a</sup> The computed IR spectrum was scaled by a factor of 0.96, according to references 34 and 35 in the manuscript. <sup>b</sup> Due to the absence of symmetry, only the main vibrational modes were included in the assignment.

**Figure S1.** Optimized structures of compounds **1c-8c**.

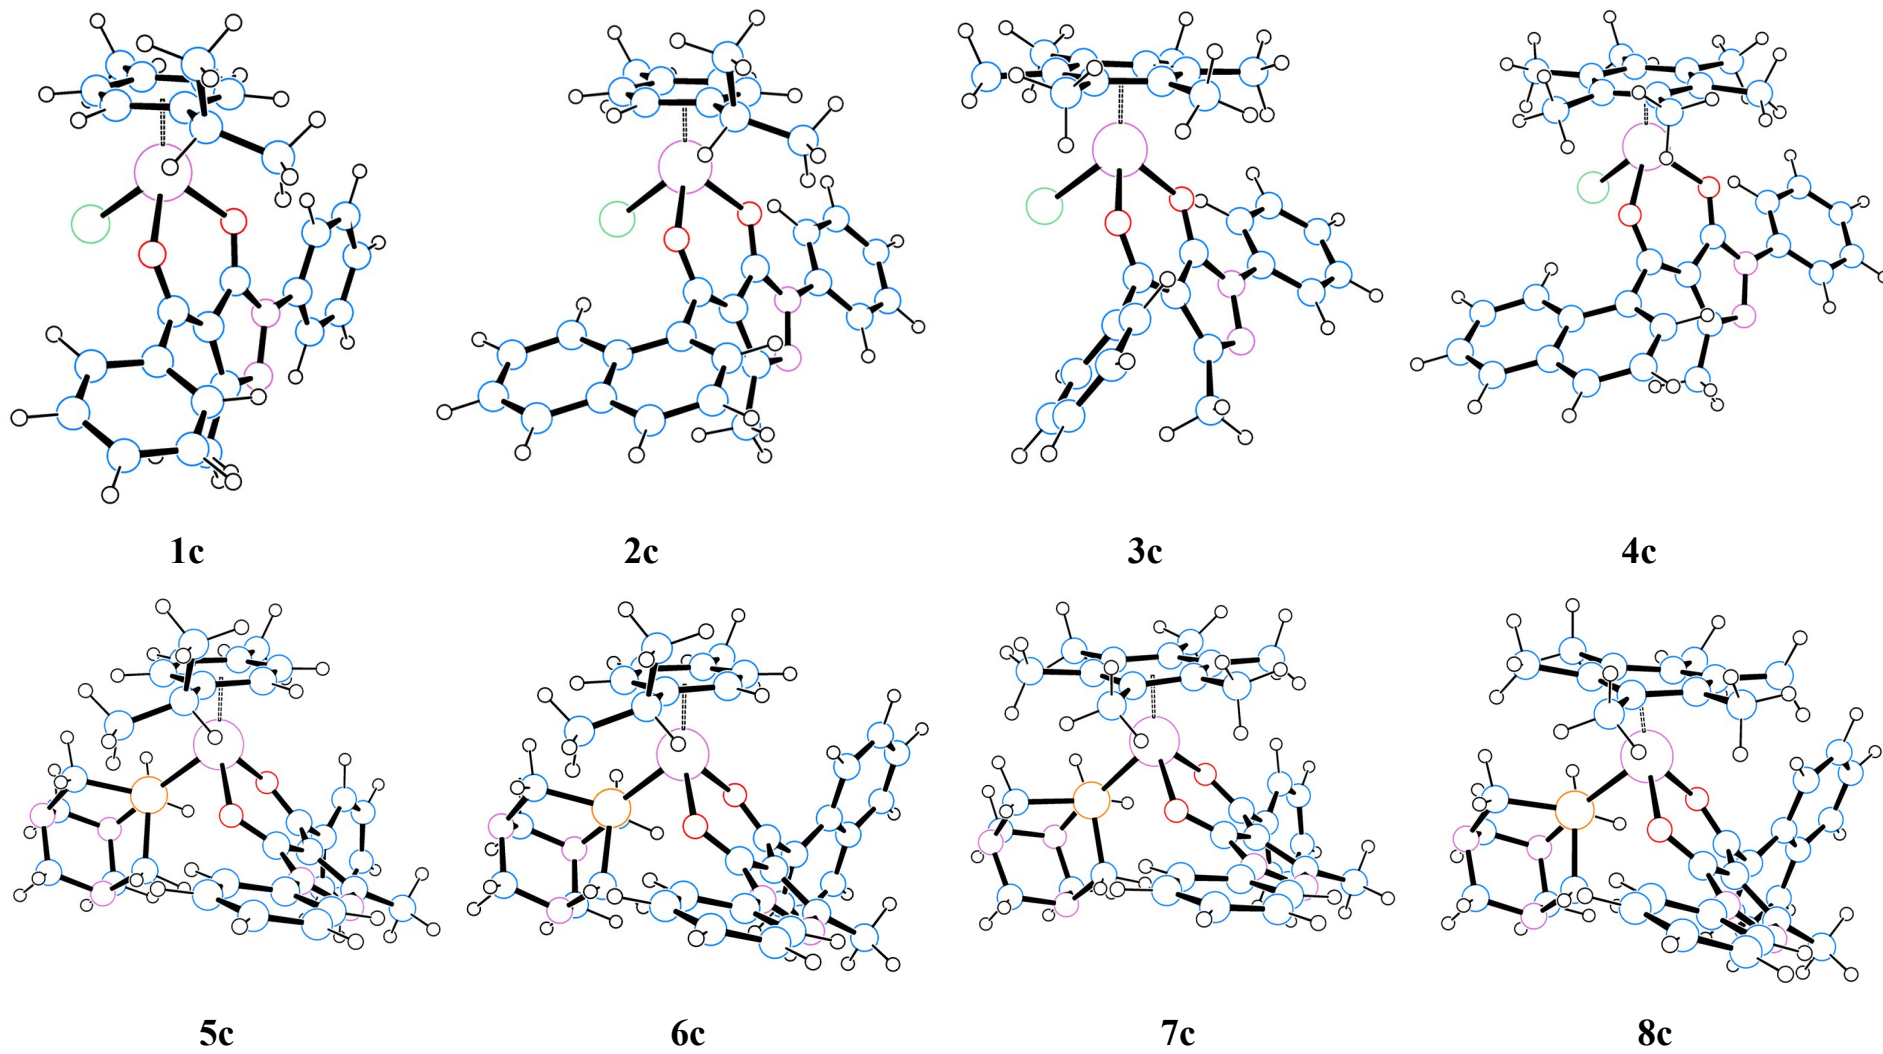

**Figure S2.** HOMOs of **1c-8c** (Isovalue = 0.04).

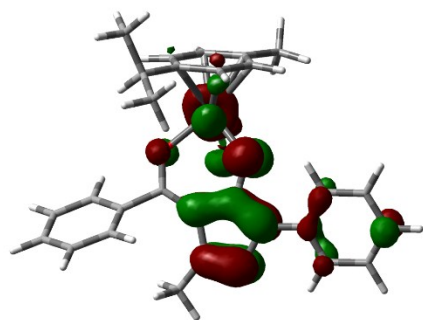

**1c**

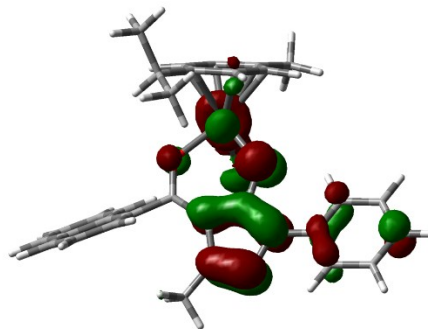

**2c**

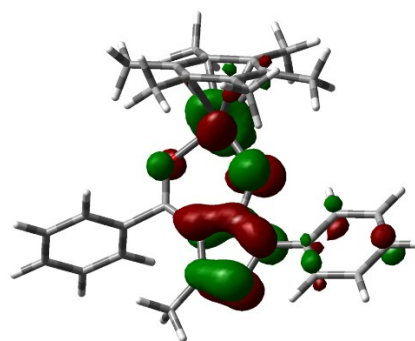

**3c**

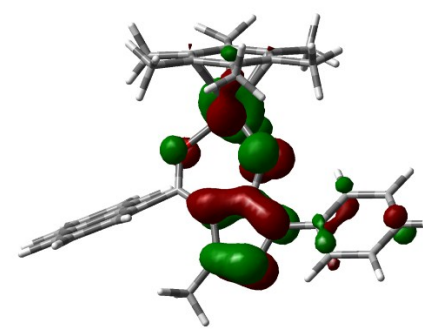

**4c**

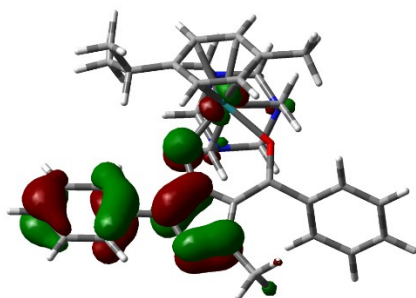

**5c**

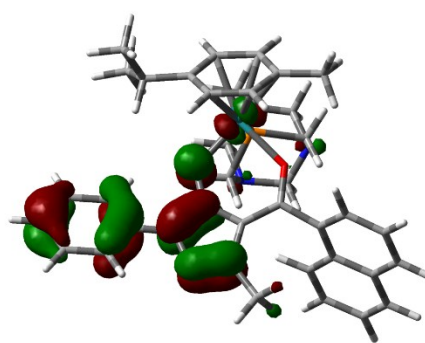

**6c**

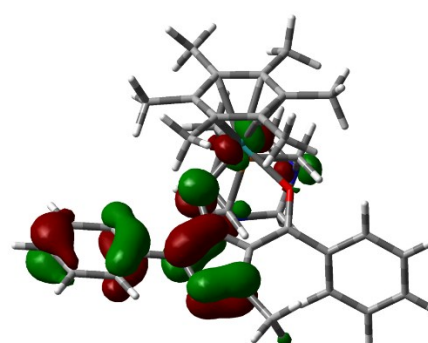

**7c**

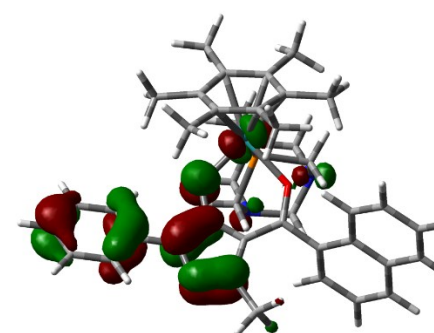

**8c**



**Figure S3.** Selected MOs of compounds HQ<sup>Ph</sup> and HQ<sup>naph</sup> (Isovalue = 0.04).

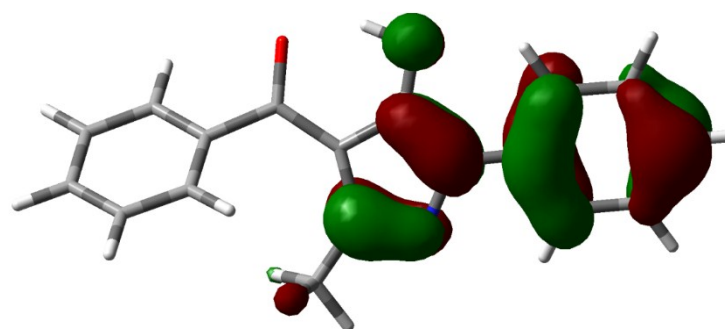

**HOMO HQ<sup>Ph</sup>**

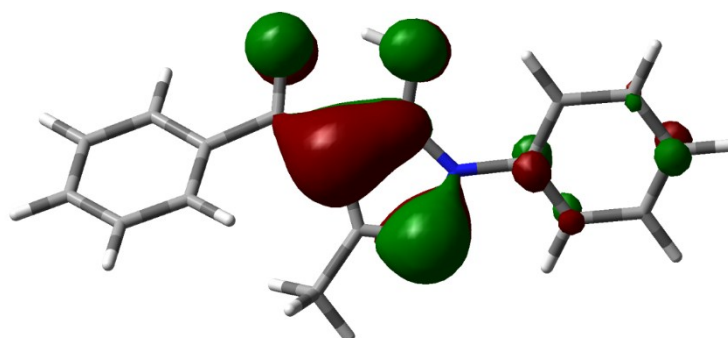

**HOMO-1 HQ<sup>Ph</sup>**

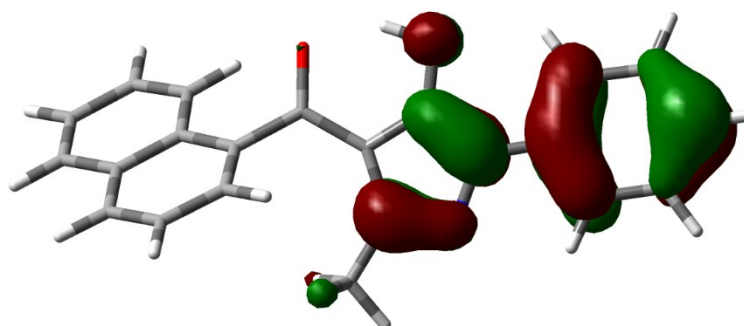

**HOMO-1 HQ<sup>naph</sup>**

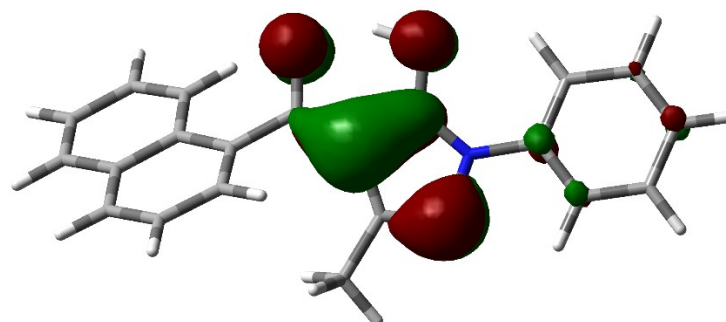

**HOMO-2 HQ<sup>naph</sup>**

**Figure S4.** Naphthyl rotation barrier that interconverts the conformers of proligand HQ<sup>naph</sup>.

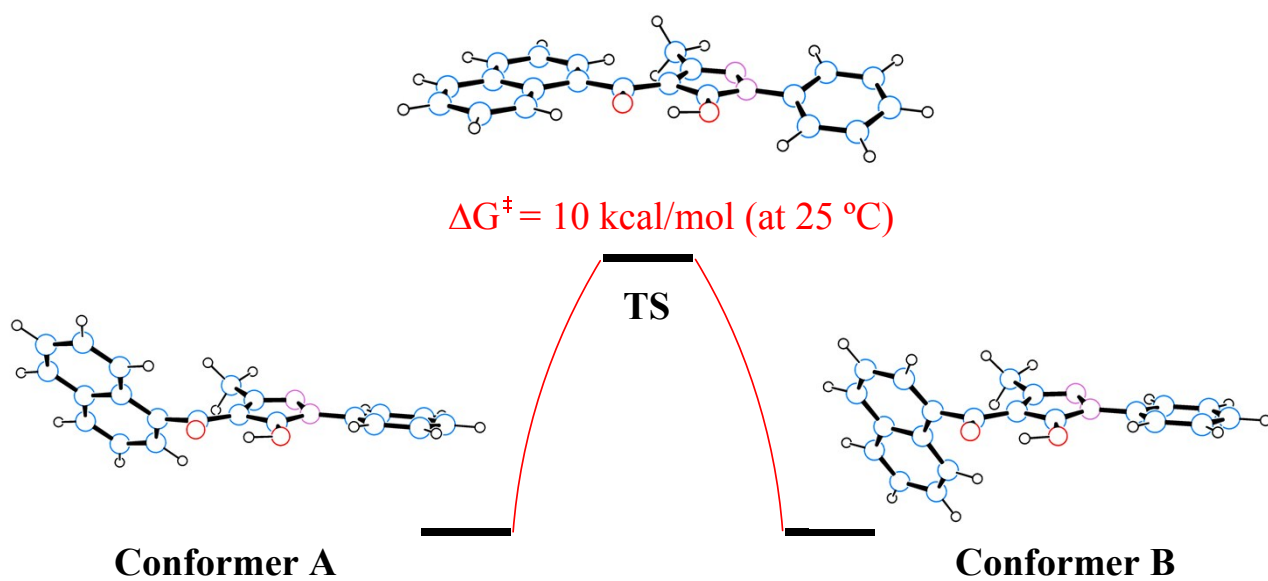

**Table S5.** Fractional coordinates of the computed compounds

**[Ru(cym)(Q<sup>Ph</sup>)Cl] (1c)**

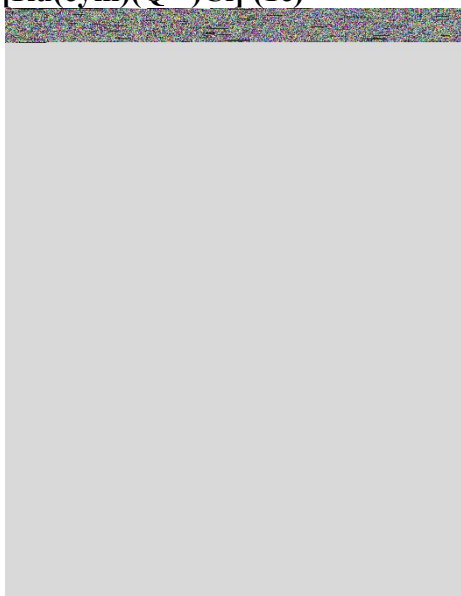

|    |             |             |             |
|----|-------------|-------------|-------------|
| Ru | 0.49471800  | -1.45258200 | -0.43195500 |
| Cl | -0.23707400 | -0.75468400 | -2.64641100 |
| O  | -1.20241900 | -0.45972700 | 0.30977500  |
| O  | 1.50901800  | 0.38798700  | -0.34950800 |
| C  | 0.75665700  | -2.78650300 | 1.37495500  |
| H  | 0.41817000  | -2.55696400 | 2.37809500  |
| C  | -4.01873100 | -0.36833400 | 1.02385200  |
| H  | -3.15702200 | -0.98526900 | 1.23612000  |
| C  | 1.47909600  | -3.22930000 | -1.32164900 |
| H  | 1.72979200  | -3.29609300 | -2.37457600 |
| C  | -5.30976900 | -0.84203200 | 1.25884100  |
| H  | -5.43825200 | -1.84333800 | 1.66227200  |
| C  | 2.05288100  | 3.58520000  | 0.84662500  |
| H  | 1.28252300  | 3.55290900  | 1.61167200  |
| N  | -2.54612100 | 1.44768600  | 0.25372100  |
| C  | 2.04317500  | -2.39139100 | 0.94957300  |
| C  | 1.00876100  | 1.55722500  | -0.23623600 |
| C  | -1.34218800 | 0.79855300  | 0.14526500  |
| C  | 3.05158000  | -1.69733500 | 1.84820800  |
| H  | 3.54266100  | -0.93898400 | 1.22476700  |
| C  | -4.95737900 | 1.72593200  | 0.23260000  |
| H  | -4.80384700 | 2.72170200  | -0.16265100 |
| C  | -3.84003600 | 0.92152100  | 0.50222900  |
| N  | -2.41707500 | 2.80844200  | -0.00965800 |
| C  | 2.38896900  | -2.62677300 | -0.43084200 |
| H  | 3.33244300  | -2.24897500 | -0.81099000 |
| C  | 4.05243600  | 3.63168800  | -1.10292200 |
| H  | 4.82662000  | 3.65238300  | -1.86515100 |
| C  | 4.06275900  | 4.57156200  | -0.06824900 |
| H  | 4.84721400  | 5.32230100  | -0.02304400 |
| C  | 3.05353100  | 2.66112900  | -1.15658600 |
| H  | 3.04314400  | 1.91747800  | -1.94735400 |
| C  | 2.03515100  | 2.64331200  | -0.19137100 |
| C  | 0.17098300  | -3.65037000 | -0.88704700 |
| C  | -6.42549400 | -0.04870300 | 0.99046300  |
| H  | -7.42698300 | -0.42582700 | 1.17817000  |
| C  | -0.16829300 | -3.39376100 | 0.45838000  |
| H  | -1.18043500 | -3.59457700 | 0.79465800  |
| C  | -0.37088400 | 1.81971400  | -0.12405000 |

|   |             |             |             |
|---|-------------|-------------|-------------|
| C | -6.23807500 | 1.23719200  | 0.47873900  |
| H | -7.09572900 | 1.86937300  | 0.26401700  |
| C | -1.14481800 | 3.03675500  | -0.22408700 |
| C | 4.12326200  | -2.71115200 | 2.30291300  |
| H | 3.68056600  | -3.49376300 | 2.93075000  |
| H | 4.89797900  | -2.20475100 | 2.88939800  |
| H | 4.60942100  | -3.19827300 | 1.45033200  |
| C | -0.72830200 | 4.42397400  | -0.61440500 |
| H | -1.62667800 | 5.01232800  | -0.81837100 |
| H | -0.10129000 | 4.40921500  | -1.51234400 |
| H | -0.15517500 | 4.92741600  | 0.17029600  |
| C | 3.06748400  | 4.54103800  | 0.91096300  |
| H | 3.08103000  | 5.26015600  | 1.72551400  |
| C | -0.80532100 | -4.23925800 | -1.86705000 |
| H | -0.48422100 | -5.24403500 | -2.16984500 |
| H | -0.86833100 | -3.60800500 | -2.75947700 |
| H | -1.80504900 | -4.31502100 | -1.43042300 |
| C | 2.42906700  | -0.97276300 | 3.04845600  |
| H | 1.65555500  | -0.26698200 | 2.72939800  |
| H | 3.20286600  | -0.40963400 | 3.58080500  |
| H | 1.98626800  | -1.67324400 | 3.76696300  |

**[(cym)Ru(Q<sup>naph</sup>)Cl] (2c)**

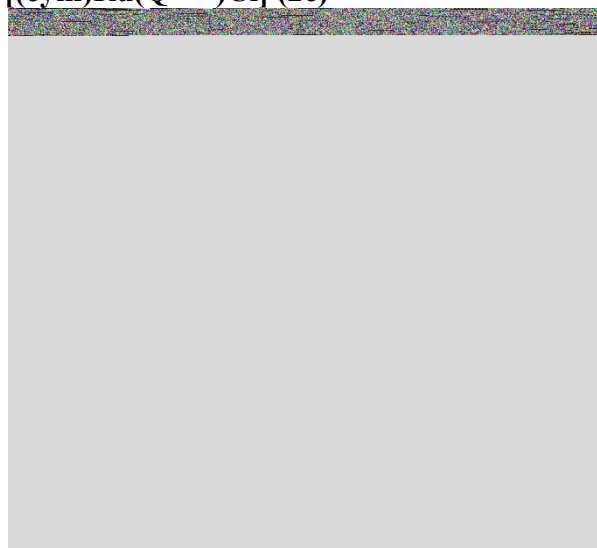

|    |             |             |             |
|----|-------------|-------------|-------------|
| Ru | 0.59459800  | 1.60802200  | -0.36113300 |
| Cl | 0.35527600  | 0.66787100  | -2.60165000 |
| O  | 1.77544400  | -0.07268600 | 0.07136000  |
| O  | -1.10142600 | 0.47027900  | 0.11772000  |
| C  | -2.57498500 | -1.27089100 | 0.58506800  |
| N  | 2.02755100  | -2.38572900 | 0.16810600  |
| C  | 3.43800200  | -2.53481900 | 0.14750500  |
| C  | 3.99373400  | -3.73478500 | 0.61384800  |
| H  | 3.33394800  | -4.51491600 | 0.97251100  |
| C  | -0.01264900 | -3.11961500 | 0.28787400  |
| C  | -4.93531300 | -1.56990100 | -0.04899200 |
| C  | -3.60597400 | -1.16232300 | -0.40420000 |
| N  | 1.23169000  | -3.52652900 | 0.25451900  |
| C  | -4.18317600 | -2.12749100 | 2.19704200  |
| H  | -4.38919500 | -2.48870300 | 3.20079100  |
| C  | -2.86653500 | -1.74516100 | 1.84980200  |
| H  | -2.07283200 | -1.81839400 | 2.58863400  |
| C  | 1.27176800  | -1.24280100 | 0.12845500  |
| C  | -1.18542100 | -0.79321100 | 0.28179300  |
| C  | -0.09418100 | -1.67614900 | 0.22646300  |
| C  | 4.27224800  | -1.51983400 | -0.34292800 |

|   |             |             |             |
|---|-------------|-------------|-------------|
| H | 3.83948400  | -0.60313500 | -0.71925000 |
| C | -1.10232100 | -4.14846400 | 0.31619600  |
| H | -0.65342200 | -5.13670600 | 0.18652500  |
| H | -1.82825900 | -3.97935700 | -0.48647100 |
| H | -1.65823100 | -4.13580600 | 1.25928100  |
| C | -3.36155300 | -0.69696000 | -1.72723800 |
| H | -2.36192900 | -0.38218300 | -2.01144700 |
| C | -5.96549400 | -1.49037600 | -1.02503000 |
| H | -6.97023300 | -1.80117500 | -0.74796900 |
| C | 5.65393500  | -1.71186200 | -0.34830000 |
| H | 6.29433700  | -0.92255400 | -0.73373600 |
| C | 5.37557600  | -3.91032100 | 0.59540100  |
| H | 5.79627400  | -4.84450800 | 0.95822700  |
| C | 6.21521600  | -2.90092500 | 0.11952900  |
| H | 7.29249900  | -3.04171600 | 0.10873900  |
| C | -5.19263500 | -2.04347900 | 1.26593300  |
| H | -6.20628400 | -2.34153700 | 1.52371300  |
| C | -4.38588700 | -0.63749600 | -2.64664700 |
| H | -4.18199800 | -0.28248600 | -3.65307200 |
| C | -5.69892300 | -1.03491400 | -2.29588200 |
| H | -6.49432800 | -0.98124100 | -3.03447300 |
| C | 0.27907200  | 3.65831800  | -1.15259800 |
| H | -0.21028600 | 3.85633000  | -2.09983300 |
| C | -0.49895400 | 3.50765700  | 0.01152900  |
| H | -1.57829300 | 3.59601100  | -0.05756100 |
| C | -0.22173300 | 2.02401000  | 3.56556200  |
| H | 0.07297600  | 1.05012700  | 3.16130400  |
| H | -0.97146500 | 1.85378900  | 4.34549200  |
| H | 0.65205200  | 2.47673800  | 4.05002900  |
| C | 1.48367700  | 2.87387500  | 1.28043700  |
| H | 1.96080600  | 2.48769100  | 2.17293800  |
| C | 1.70359000  | 3.43478900  | -1.13348200 |
| C | 2.27389400  | 3.02453900  | 0.08917500  |
| H | 3.32161000  | 2.74350800  | 0.11759700  |
| C | 2.50751900  | 3.54607100  | -2.39884400 |
| H | 2.02872200  | 2.97379300  | -3.19992600 |
| H | 3.51996700  | 3.15755700  | -2.25833500 |
| H | 2.58123000  | 4.59505200  | -2.71272900 |
| C | 0.09350900  | 3.11618200  | 1.26777700  |
| C | -1.19106200 | 4.31233400  | 3.05195300  |
| H | -1.65546500 | 4.95344400  | 2.29450000  |
| H | -0.30771200 | 4.83386500  | 3.43951200  |
| H | -1.90331000 | 4.19410300  | 3.87603600  |
| C | -0.80778800 | 2.93189600  | 2.47667800  |
| H | -1.72243800 | 2.45329400  | 2.10258400  |

**[(hmb)Ru(Q<sup>Ph</sup>)Cl] (3c)**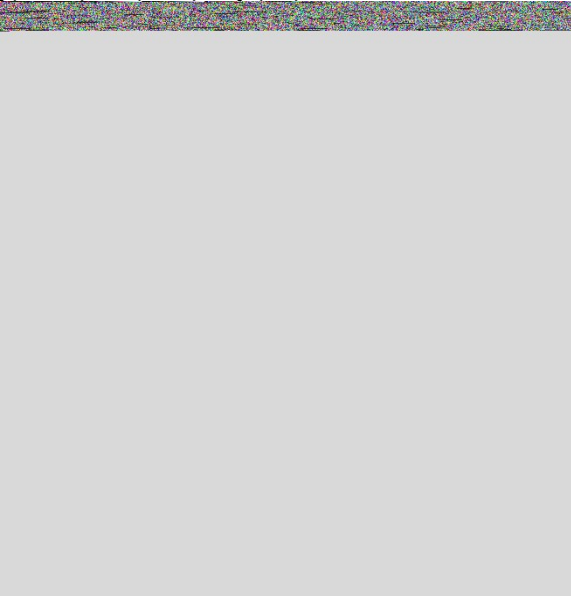

|    |             |             |             |
|----|-------------|-------------|-------------|
| Ru | 0.32840600  | -1.36470300 | -0.14042800 |
| Cl | 0.48288700  | -0.82626700 | -2.52225800 |
| N  | -1.60522500 | 3.50555700  | -0.03990500 |
| N  | -2.08055800 | 2.19842200  | -0.09646400 |
| O  | -1.25936400 | 0.02481000  | -0.08351900 |
| O  | 1.66916900  | 0.24278300  | 0.14444100  |
| C  | 3.52432700  | 2.36725800  | 1.11991000  |
| H  | 3.24822900  | 1.82029800  | 2.01728000  |
| C  | 4.70731700  | 3.10529900  | 1.08261800  |
| H  | 5.35107700  | 3.13883200  | 1.95759800  |
| C  | 5.06730600  | 3.79360400  | -0.07880100 |
| H  | 5.99302000  | 4.36194000  | -0.10961100 |
| C  | 4.23896800  | 3.74359100  | -1.20183700 |
| H  | 4.52240200  | 4.26415700  | -2.11254100 |
| C  | 3.04455900  | 3.02259200  | -1.16071800 |
| H  | 2.40284600  | 2.97048600  | -2.03555600 |
| C  | 2.67787400  | 2.33559300  | 0.00394500  |
| C  | 1.43967600  | 1.48926800  | 0.01558300  |
| C  | 0.15396900  | 2.05530500  | -0.09300300 |
| C  | -1.05796700 | 1.28275500  | -0.10642000 |
| C  | -3.47861200 | 1.97071800  | -0.05861000 |
| C  | -4.03489500 | 0.79400700  | -0.58088000 |
| H  | -3.39189700 | 0.04895500  | -1.03024700 |
| C  | -5.41625600 | 0.60598000  | -0.52600800 |
| H  | -5.84189600 | -0.30595800 | -0.93694100 |
| C  | -6.24992300 | 1.57746600  | 0.03070900  |
| H  | -7.32495400 | 1.42386800  | 0.06570800  |
| C  | -5.68817000 | 2.75343200  | 0.53304000  |
| H  | -6.32511700 | 3.52244000  | 0.96230500  |
| C  | -4.31006500 | 2.95500100  | 0.49368400  |
| H  | -3.86447500 | 3.86646200  | 0.87302400  |
| C  | -0.29707200 | 3.43093300  | -0.04538400 |
| C  | 0.48299800  | 4.70918000  | 0.02539500  |
| H  | 1.04774800  | 4.89602000  | -0.89373100 |
| H  | 1.20626300  | 4.69660300  | 0.84786100  |
| H  | -0.21691000 | 5.53490300  | 0.17842300  |
| C  | 0.82477900  | -2.31376900 | 1.83201000  |
| C  | -0.56465000 | -2.50370100 | 1.60218800  |
| C  | -1.01797700 | -3.07590300 | 0.34651700  |
| C  | -0.07306400 | -3.54925700 | -0.60359000 |
| C  | 1.34680500  | -3.34686100 | -0.37624300 |
| C  | 1.79095600  | -2.75969500 | 0.84143200  |

|   |             |             |             |
|---|-------------|-------------|-------------|
| C | 1.32479200  | -1.60008900 | 3.06863000  |
| H | 0.56449400  | -0.94405700 | 3.49278300  |
| H | 2.18839600  | -0.97593200 | 2.83287900  |
| H | 1.62815800  | -2.31598700 | 3.84483000  |
| C | -1.60605600 | -2.05534100 | 2.60453900  |
| H | -1.18948600 | -1.93546600 | 3.60486500  |
| H | -2.40914700 | -2.79497700 | 2.67439900  |
| H | -2.05774900 | -1.10371100 | 2.30103100  |
| C | -2.50237500 | -3.12562100 | 0.06118900  |
| H | -2.70149000 | -3.15043500 | -1.01008800 |
| H | -3.00323300 | -2.23996100 | 0.45647100  |
| H | -2.96573200 | -4.01194400 | 0.51630300  |
| C | -0.51994100 | -4.20149800 | -1.89258300 |
| H | 0.17315900  | -4.99732200 | -2.17774200 |
| H | -0.54409800 | -3.46762100 | -2.70720100 |
| H | -1.50923900 | -4.65098400 | -1.79508100 |
| C | 2.31139000  | -3.73052400 | -1.47490400 |
| H | 1.90934400  | -3.44338800 | -2.44839600 |
| H | 2.49362500  | -4.81409000 | -1.47597700 |
| H | 3.27053700  | -3.22446700 | -1.37271600 |
| C | 3.26179200  | -2.52353300 | 1.11111300  |
| H | 3.49488900  | -2.71089400 | 2.16301100  |
| H | 3.53583900  | -1.48671100 | 0.88156500  |
| H | 3.89560500  | -3.18331500 | 0.51878300  |

**[(hmb)Ru(Q<sup>naph</sup>)Cl] (4c)**

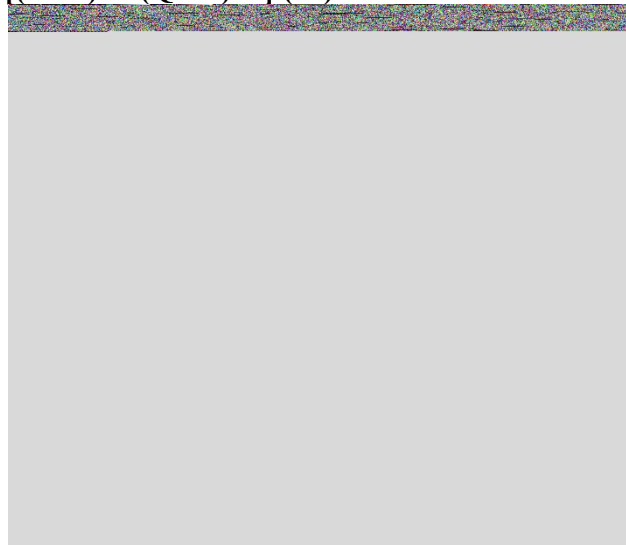

|    |             |             |             |
|----|-------------|-------------|-------------|
| Ru | -0.58560800 | -1.42704300 | -0.01596100 |
| Cl | -0.21469000 | -0.88574700 | -2.37747100 |
| O  | -1.63614100 | 0.39845200  | 0.10555300  |
| O  | 1.19650200  | -0.35408300 | 0.34414100  |
| C  | 2.78664100  | 1.32155600  | 0.64351900  |
| N  | -1.69159200 | 2.71039000  | -0.14580000 |
| C  | -3.08272100 | 2.94929500  | -0.27162100 |
| C  | -3.59614600 | 4.18625400  | 0.14009600  |
| H  | -2.91768700 | 4.93018300  | 0.54025900  |
| C  | 0.39277800  | 3.29711200  | -0.02202100 |
| C  | 5.19057200  | 1.31835100  | 0.10785300  |
| C  | 3.84683500  | 0.96738000  | -0.25370000 |
| N  | -0.81192800 | 3.78988200  | -0.17548400 |
| C  | 4.39361000  | 2.30191800  | 2.18581900  |
| H  | 4.58681900  | 2.80748000  | 3.12790700  |
| C  | 3.06456300  | 1.97489600  | 1.82922300  |
| H  | 2.24883700  | 2.23379500  | 2.49908600  |
| C  | -1.03407000 | 1.51918200  | 0.01986600  |

|   |             |             |             |
|---|-------------|-------------|-------------|
| C | 1.37524400  | 0.90912900  | 0.34412900  |
| C | 0.35831300  | 1.85686700  | 0.12389200  |
| C | -3.93510800 | 1.98130000  | -0.82115400 |
| H | -3.52673500 | 1.04078100  | -1.16714000 |
| C | 1.55985700  | 4.23603000  | -0.08722700 |
| H | 1.19629400  | 5.22377300  | -0.38257000 |
| H | 2.30181700  | 3.89720000  | -0.81839600 |
| H | 2.07525900  | 4.32462200  | 0.87457600  |
| C | 3.62058800  | 0.31142700  | -1.49692800 |
| H | 2.60999200  | 0.03872700  | -1.78521700 |
| C | 6.25192400  | 0.99252500  | -0.77974200 |
| H | 7.26734700  | 1.26155200  | -0.49788500 |
| C | -5.29872900 | 2.25374200  | -0.93303500 |
| H | -5.95472000 | 1.50229600  | -1.36500500 |
| C | -4.95955600 | 4.44489500  | 0.01330100  |
| H | -5.35019200 | 5.40726500  | 0.33346500  |
| C | -5.81961500 | 3.48024600  | -0.51642300 |
| H | -6.88237800 | 3.68544300  | -0.61105300 |
| C | 5.43146700  | 1.98194100  | 1.34116100  |
| H | 6.45552200  | 2.23511800  | 1.60575400  |
| C | 4.67536800  | 0.01496800  | -2.33228000 |
| H | 4.48498600  | -0.48308600 | -3.27901400 |
| C | 6.00233300  | 0.35457300  | -1.97313800 |
| H | 6.82186800  | 0.11292500  | -2.64475200 |
| C | -0.48079100 | -3.64876500 | -0.44543900 |
| C | 0.34433100  | -3.33683100 | 0.66930600  |
| C | -1.57989900 | -2.25483300 | 1.81631700  |
| C | -1.86737500 | -3.21272400 | -0.46597300 |
| C | -2.41646200 | -2.54457300 | 0.66306500  |
| C | -2.66886500 | -3.44246900 | -1.72667200 |
| H | -2.05992000 | -3.22809200 | -2.60706600 |
| H | -3.53985600 | -2.79098800 | -1.78406800 |
| H | -3.01575500 | -4.48322000 | -1.78597000 |
| C | -0.22513600 | -2.68327900 | 1.83419100  |
| C | 0.67656500  | -2.40989500 | 3.01907300  |
| H | 1.34613500  | -3.25710600 | 3.19155500  |
| H | 1.30065900  | -1.52634800 | 2.84328400  |
| H | 0.10904400  | -2.25351300 | 3.93695100  |
| C | 1.82814200  | -3.62839300 | 0.65693000  |
| H | 2.38492800  | -2.79897400 | 1.09821000  |
| H | 2.06010100  | -4.53959800 | 1.22504700  |
| H | 2.20578000  | -3.75447000 | -0.35712500 |
| C | 0.06932100  | -4.37403400 | -1.65340400 |
| H | 0.33790000  | -3.65942300 | -2.44084900 |
| H | 0.94933600  | -4.96791800 | -1.40334200 |
| H | -0.67962200 | -5.05845100 | -2.06098300 |
| C | -3.85217100 | -2.06586900 | 0.68895600  |
| H | -3.90809100 | -0.98379000 | 0.52272400  |
| H | -4.46469800 | -2.56013100 | -0.06439400 |
| H | -4.30419000 | -2.27680200 | 1.66300200  |
| C | -2.16852600 | -1.44896200 | 2.95266400  |
| H | -2.81550200 | -0.65763800 | 2.56899600  |
| H | -2.76771000 | -2.08358000 | 3.61978900  |
| H | -1.39699500 | -0.96505100 | 3.55129900  |



**[(cym)Ru(Q<sup>Ph</sup>)PTA]<sup>+</sup> (5c), cation of 5**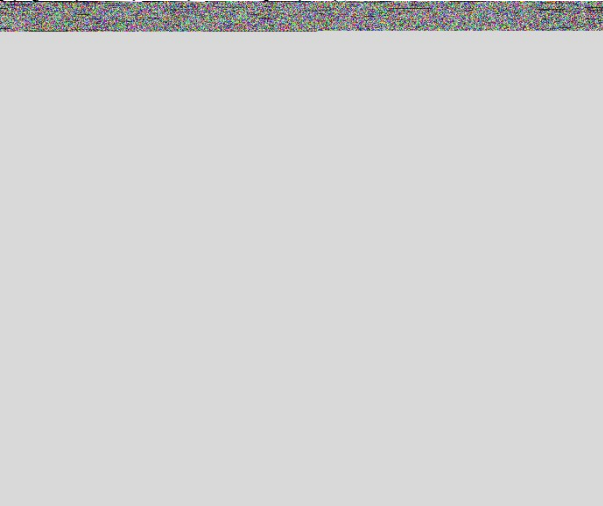

|    |             |             |             |
|----|-------------|-------------|-------------|
| Ru | 0.06128800  | -0.80716400 | 1.14585700  |
| P  | -1.03786200 | -1.76632500 | -0.69691400 |
| O  | 1.19215800  | 0.27065300  | -0.26102900 |
| O  | -1.43467900 | 0.66695800  | 0.98091500  |
| N  | 1.51623900  | 3.70817100  | -0.85004600 |
| N  | 1.95745300  | 2.38870600  | -0.86017300 |
| N  | -3.44718900 | -2.37933900 | -1.91463600 |
| N  | -1.61827000 | -1.64817300 | -3.40053300 |
| N  | -1.55991800 | -3.89722300 | -2.38759600 |
| C  | -2.60117000 | 2.62521800  | 0.49497800  |
| C  | 3.29865900  | 2.11625700  | -1.25558300 |
| C  | 0.28280300  | 3.70045800  | -0.41155300 |
| C  | 1.00723300  | 1.53893100  | -0.37834200 |
| C  | -3.08351700 | 3.24208300  | -0.67005700 |
| H  | -2.50538000 | 3.18485600  | -1.58763100 |
| C  | -3.37194200 | 2.67028700  | 1.66799400  |
| C  | -1.33415300 | 1.84285600  | 0.46778300  |
| C  | -0.14366600 | 2.34934500  | -0.09091500 |
| C  | -3.05739000 | -1.58662700 | -3.09350500 |
| H  | -3.60501500 | -1.97461700 | -3.95811700 |
| H  | -3.35137100 | -0.54335200 | -2.94064000 |
| C  | -4.58549500 | 3.35355600  | 1.68423700  |
| C  | -0.74933800 | -3.55343400 | -1.21701900 |
| H  | 0.31291300  | -3.69907100 | -1.44628600 |
| H  | -1.00368500 | -4.22463700 | -0.38751800 |
| C  | 3.67232700  | 0.85127600  | -1.72816900 |
| H  | 2.93707600  | 0.06166000  | -1.80654000 |
| C  | -0.41962200 | 5.01369200  | -0.23783700 |
| H  | 0.31109600  | 5.81676000  | -0.35979100 |
| H  | -0.87609900 | 5.09502100  | 0.75417900  |
| H  | -1.21687300 | 5.15950000  | -0.97273300 |
| C  | 4.99662800  | 0.62554800  | -2.10740400 |
| H  | 5.28154000  | -0.35411500 | -2.48139500 |
| C  | 4.24173800  | 3.14948100  | -1.18141000 |
| H  | 3.93115700  | 4.12674500  | -0.83335100 |
| C  | -0.29210800 | -2.55023800 | 2.56070300  |
| H  | -1.04487800 | -3.32394800 | 2.44836500  |
| C  | 0.99591700  | -2.72680400 | 1.95369800  |
| H  | 1.18838600  | -3.62815600 | 1.38474500  |
| C  | 5.94408400  | 1.64703500  | -2.03011400 |
| H  | 6.97093100  | 1.46559800  | -2.33312700 |

|   |             |             |             |
|---|-------------|-------------|-------------|
| C | 5.55769400  | 2.90809500  | -1.57037100 |
| H | 6.28394100  | 3.71362600  | -1.51272500 |
| C | -4.31149800 | 3.90322000  | -0.65714800 |
| H | -4.68386300 | 4.36754200  | -1.56553700 |
| C | -2.91876600 | -1.80839300 | -0.67432400 |
| H | -3.25789300 | -2.40331300 | 0.18188400  |
| H | -3.29302900 | -0.78947300 | -0.53326300 |
| C | -5.05862700 | 3.96820400  | 0.52107100  |
| H | -6.00938200 | 4.49308000  | 0.53300300  |
| C | 1.98666800  | -1.72635300 | 2.04210500  |
| C | -0.81203800 | -0.96687300 | -2.38545200 |
| H | -1.10067200 | 0.08802000  | -2.32508800 |
| H | 0.24696600  | -0.99957800 | -2.66057700 |
| C | 1.67618500  | -0.55190100 | 2.82190100  |
| H | 2.41057600  | 0.24508400  | 2.88419400  |
| C | -3.00226000 | -3.76842400 | -2.11312800 |
| H | -3.54556100 | -4.17988500 | -2.96942600 |
| H | -3.25756900 | -4.36123100 | -1.22856000 |
| C | -1.22683500 | -3.05835500 | -3.55347200 |
| H | -0.15086700 | -3.11735200 | -3.74651500 |
| H | -1.75401300 | -3.46573800 | -4.42169300 |
| C | -0.61091200 | -1.37455200 | 3.27263000  |
| C | -1.96648000 | -1.15304000 | 3.88606700  |
| H | -2.68317600 | -1.90854400 | 3.55348200  |
| H | -2.35761700 | -0.16753200 | 3.61523600  |
| H | -1.90129200 | -1.20379900 | 4.97977200  |
| C | 0.42474300  | -0.38174900 | 3.41668100  |
| H | 0.19952500  | 0.54466800  | 3.93625100  |
| C | 3.36351400  | -1.84134000 | 1.40999800  |
| H | 3.60023200  | -0.84880200 | 1.00602000  |
| C | 3.44630000  | -2.84398000 | 0.25245600  |
| H | 2.70729500  | -2.62428200 | -0.52569100 |
| H | 3.30551200  | -3.87778300 | 0.59034500  |
| H | 4.43844300  | -2.78944000 | -0.20592700 |
| C | 4.40201900  | -2.17563500 | 2.50458900  |
| H | 5.40759900  | -2.18314600 | 2.07210700  |
| H | 4.21203700  | -3.16412800 | 2.93868100  |
| H | 4.39302600  | -1.44134200 | 3.31730800  |
| H | -5.16560300 | 3.40411900  | 2.60100400  |
| H | -3.00536600 | 2.18412500  | 2.56684700  |

**[(cym)Ru(Q<sup>naph</sup>)PTA]<sup>+</sup> (6c), cation of 6**

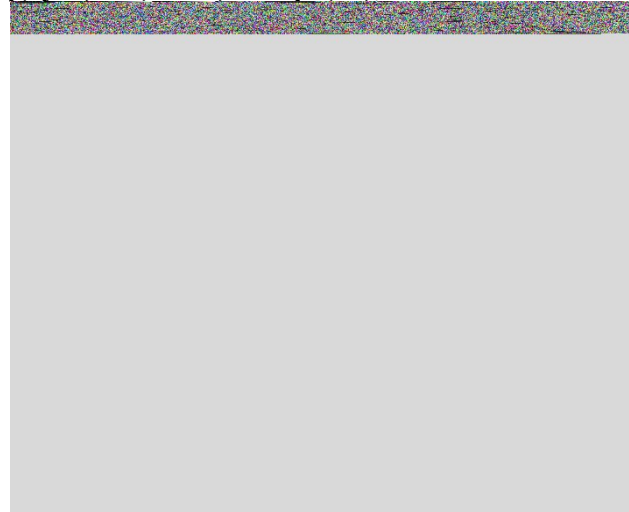

|    |             |             |             |
|----|-------------|-------------|-------------|
| Ru | -0.51009200 | 0.65030300  | 1.18024900  |
| P  | -0.41976300 | 2.19574200  | -0.58721400 |
| O  | -1.41743800 | -0.68018700 | -0.17685800 |
| O  | 1.36409800  | 0.04594600  | 0.44296500  |
| N  | -0.37678400 | -3.66052200 | -1.69742500 |
| N  | -1.32790700 | -2.75116500 | -1.23885000 |
| N  | 1.15290400  | 3.88899000  | -2.11665900 |
| N  | -0.65520300 | 2.69689600  | -3.29976300 |
| N  | -1.19548800 | 4.56716100  | -1.78661400 |
| C  | 3.08480700  | -1.06637700 | -0.68075900 |
| C  | -2.70592900 | -3.10428300 | -1.31162000 |
| C  | 0.79975100  | -3.13490900 | -1.47163300 |
| C  | -0.74543800 | -1.65148800 | -0.68413800 |
| C  | 3.44131300  | -0.91910600 | -2.01097600 |
| H  | 2.66486600  | -0.80639500 | -2.76298500 |
| C  | 4.09521100  | -1.22290700 | 0.32401300  |
| C  | 1.63780400  | -0.95098600 | -0.32273800 |
| C  | 0.67309300  | -1.83972000 | -0.82622600 |
| C  | 3.80330900  | -1.43501200 | 1.69957700  |
| H  | 2.76707400  | -1.47574600 | 2.01899800  |
| C  | 0.73656600  | 3.17793700  | -3.33761900 |
| H  | 0.83331100  | 3.86794000  | -4.18165600 |
| H  | 1.40774400  | 2.33015700  | -3.50765200 |
| C  | 5.46972300  | -1.21116800 | -0.08642100 |
| C  | -1.45771400 | 3.76943900  | -0.58837500 |
| H  | -2.52059500 | 3.50372800  | -0.54913500 |
| H  | -1.23020100 | 4.36431400  | 0.30454300  |
| C  | -3.70477900 | -2.12241800 | -1.34319900 |
| H  | -3.43688900 | -1.07437700 | -1.32112100 |
| C  | 2.02251000  | -3.92011700 | -1.83664400 |
| H  | 1.71541200  | -4.92345600 | -2.14120600 |
| H  | 2.71385900  | -4.00023700 | -0.99109900 |
| H  | 2.57463700  | -3.45963600 | -2.66183300 |
| C  | -5.04387500 | -2.50995200 | -1.41403700 |
| H  | -5.81644800 | -1.74651500 | -1.44656600 |
| C  | -3.04685800 | -4.46170900 | -1.36882900 |
| H  | -2.26077000 | -5.20662100 | -1.36415400 |
| C  | 6.48697400  | -1.38204600 | 0.89184600  |
| H  | 7.52502200  | -1.36821900 | 0.57008000  |
| C  | -0.58764900 | 2.21963200  | 2.81598900  |

|   |             |             |             |
|---|-------------|-------------|-------------|
| H | -0.30296200 | 3.26176800  | 2.71215000  |
| C | -1.93590900 | 1.82538400  | 2.52277800  |
| H | -2.64343600 | 2.57644800  | 2.19342100  |
| C | -5.39288300 | -3.86011400 | -1.46363400 |
| H | -6.43653000 | -4.15389100 | -1.52428900 |
| C | -4.38829000 | -4.83039800 | -1.44566600 |
| H | -4.64709600 | -5.88423500 | -1.49139000 |
| C | 4.79814300  | -0.89733400 | -2.40472300 |
| H | 5.05041000  | -0.76885300 | -3.45290900 |
| C | 1.24651300  | 2.98620300  | -0.96704500 |
| H | 1.59364700  | 3.53934000  | -0.08637100 |
| H | 1.97690100  | 2.19465800  | -1.16242500 |
| C | 5.78876000  | -1.03741100 | -1.46009000 |
| H | 6.83487200  | -1.02290000 | -1.75461800 |
| C | -2.32995000 | 0.47291500  | 2.59833800  |
| C | 6.17018700  | -1.57152700 | 2.21711800  |
| H | 6.95618200  | -1.70575800 | 2.95422000  |
| C | -0.83657400 | 1.61548400  | -2.32876700 |
| H | -0.19331500 | 0.76758000  | -2.58755700 |
| H | -1.87132500 | 1.25865100  | -2.35261800 |
| C | 4.81380800  | -1.60547100 | 2.62082800  |
| H | 4.57123300  | -1.77714500 | 3.66600100  |
| C | -1.34785400 | -0.48151600 | 3.05537200  |
| H | -1.61816800 | -1.53178800 | 3.10069900  |
| C | 0.21223300  | 4.99341800  | -1.86992000 |
| H | 0.29941100  | 5.70550000  | -2.69645200 |
| H | 0.49062600  | 5.50778500  | -0.94422100 |
| C | -1.54130800 | 3.83780900  | -3.01904700 |
| H | -2.57614700 | 3.48639900  | -2.95420700 |
| H | -1.46959600 | 4.53894400  | -3.85639200 |
| C | 0.38692600  | 1.27450300  | 3.20409000  |
| C | 1.81255400  | 1.66426700  | 3.48618800  |
| H | 2.02332500  | 2.67861800  | 3.13668900  |
| H | 2.51167100  | 0.97962300  | 2.99577100  |
| H | 2.00602000  | 1.63172600  | 4.56565100  |
| C | -0.03976500 | -0.09457100 | 3.35095200  |
| H | 0.69206300  | -0.84773200 | 3.62625900  |
| C | -3.72904900 | -0.01894300 | 2.26840100  |
| H | -3.60025100 | -0.95031000 | 1.70233200  |
| C | -4.54525100 | 0.94330000  | 1.39668300  |
| H | -4.01318300 | 1.20121000  | 0.47434700  |
| H | -4.79728400 | 1.86865300  | 1.92863700  |
| H | -5.48964400 | 0.46786300  | 1.11497400  |
| C | -4.47926700 | -0.34956600 | 3.57832800  |
| H | -5.46006500 | -0.77723100 | 3.34707700  |
| H | -4.63592900 | 0.55307600  | 4.18017500  |
| H | -3.93497400 | -1.07543300 | 4.19203400  |

**[(cym)Ru(Q<sup>naph</sup>)PTA]<sup>+</sup> (i6c), Isomer cation of 6**

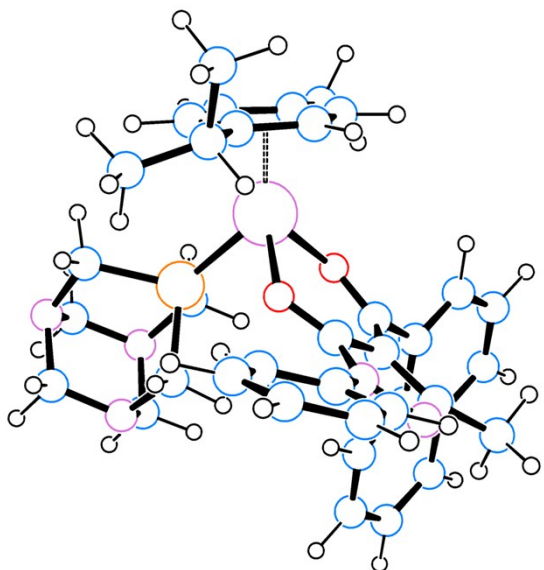

|    |             |             |             |
|----|-------------|-------------|-------------|
| Ru | 0.97353400  | -0.89743700 | 1.10735100  |
| P  | 0.13688500  | -2.04541100 | -0.77202600 |
| O  | 1.34386300  | 0.72007400  | -0.18803100 |
| O  | -1.00698400 | -0.21599400 | 1.29905100  |
| N  | -0.03234600 | 3.93060600  | -0.48411700 |
| N  | 0.96986600  | 2.97496700  | -0.64549100 |
| N  | -1.97846300 | -3.44776400 | -1.88129300 |
| N  | -0.75790000 | -1.92524000 | -3.39060900 |
| N  | 0.27557800  | -4.04949000 | -2.68049000 |
| C  | -2.95058900 | 1.06382800  | 1.29631100  |
| C  | 2.22062100  | 3.38128600  | -1.19298300 |
| C  | -1.05268800 | 3.32959100  | 0.07138400  |
| C  | 0.58887100  | 1.76056200  | -0.15831400 |
| C  | -3.30154600 | 1.01753700  | 2.63493500  |
| H  | -2.52154000 | 0.94332300  | 3.38753100  |
| C  | -3.96648600 | 1.13885100  | 0.28609100  |
| C  | -1.50097600 | 0.91903300  | 0.94833100  |
| C  | -0.75632900 | 1.93038900  | 0.32048700  |
| C  | -3.69269700 | 1.15185600  | -1.11103600 |
| H  | -2.66217800 | 1.14914200  | -1.45142100 |
| C  | -2.06508200 | -2.46272400 | -2.97277500 |
| H  | -2.51877900 | -2.95586600 | -3.83818700 |
| H  | -2.71576400 | -1.63857900 | -2.66386800 |
| C  | -5.33888800 | 1.17839100  | 0.70704700  |
| C  | 1.02670500  | -3.52133000 | -1.54079700 |
| H  | 2.02615500  | -3.21221900 | -1.86870000 |
| H  | 1.15246000  | -4.30966200 | -0.78882200 |
| C  | 3.08538500  | 2.45744100  | -1.79499400 |
| H  | 2.80712700  | 1.41398200  | -1.85760400 |
| C  | -2.28215000 | 4.12430900  | 0.38569500  |
| H  | -2.07836700 | 5.17956500  | 0.18945200  |
| H  | -2.57792200 | 4.00723100  | 1.43357100  |
| H  | -3.13191800 | 3.81259700  | -0.23005700 |
| C  | 4.30047500  | 2.89896300  | -2.32134900 |
| H  | 4.96549700  | 2.18128900  | -2.79407500 |
| C  | 2.56623000  | 4.73775400  | -1.13522800 |
| H  | 1.87794400  | 5.44145600  | -0.68400500 |
| C  | -6.36570900 | 1.22834700  | -0.27534400 |

|   |             |             |             |
|---|-------------|-------------|-------------|
| H | -7.40002100 | 1.25867500  | 0.05723800  |
| C | 1.57050400  | -2.75937200 | 2.25642000  |
| H | 1.20027500  | -3.76432800 | 2.08136900  |
| C | 2.72393300  | -2.29761600 | 1.53729200  |
| H | 3.19680000  | -2.95877800 | 0.82141700  |
| C | 4.65530100  | 4.24711800  | -2.26246700 |
| H | 5.59977200  | 4.58372500  | -2.67938100 |
| C | 3.78025500  | 5.16143100  | -1.67159300 |
| H | 4.04131700  | 6.21470700  | -1.62553600 |
| C | -4.65206200 | 1.08781900  | 3.03954600  |
| H | -4.89728700 | 1.07635100  | 4.09717500  |
| C | -1.56962400 | -2.82789000 | -0.62000800 |
| H | -1.55403200 | -3.58242100 | 0.17546800  |
| H | -2.28737900 | -2.05622100 | -0.32541200 |
| C | -5.64821200 | 1.16251500  | 2.09286900  |
| H | -6.69141800 | 1.20621200  | 2.39469800  |
| C | 3.20764000  | -0.98303900 | 1.70438500  |
| C | -6.06468000 | 1.23788300  | -1.61752700 |
| H | -6.85860200 | 1.27745700  | -2.35721000 |
| C | -0.15724000 | -1.07701700 | -2.35911400 |
| H | -0.81495600 | -0.22887100 | -2.14427500 |
| H | 0.79444400  | -0.66857300 | -2.71442400 |
| C | -4.71311700 | 1.20172000  | -2.03632700 |
| H | -4.47868800 | 1.22200900  | -3.09699600 |
| C | 2.53848600  | -0.14704200 | 2.67250700  |
| H | 2.87172500  | 0.87840100  | 2.79796500  |
| C | -1.06233400 | -4.52498500 | -2.28599500 |
| H | -1.50237500 | -5.04130600 | -3.14478000 |
| H | -0.96396300 | -5.24491400 | -1.46682700 |
| C | 0.12159800  | -3.04823000 | -3.75136900 |
| H | 1.10722900  | -2.66220100 | -4.03082900 |
| H | -0.30922800 | -3.55184800 | -4.62224800 |
| C | 0.88554400  | -1.91892200 | 3.16055200  |
| C | -0.35180600 | -2.36527600 | 3.89056800  |
| H | -0.70736900 | -3.33031400 | 3.51976400  |
| H | -1.15716300 | -1.63398600 | 3.76832700  |
| H | -0.14419500 | -2.46861600 | 4.96252000  |
| C | 1.42185600  | -0.59817300 | 3.37840900  |
| H | 0.90025100  | 0.07931000  | 4.04762700  |
| C | 4.40633200  | -0.42108700 | 0.95838900  |
| H | 4.13333500  | 0.60049600  | 0.66357400  |
| C | 4.77150300  | -1.19028800 | -0.31699600 |
| H | 3.91811600  | -1.26799300 | -0.99970800 |
| H | 5.14010500  | -2.19976800 | -0.09832100 |
| H | 5.57314300  | -0.66374600 | -0.84377000 |
| C | 5.61513100  | -0.33766700 | 1.91776100  |
| H | 6.46174200  | 0.13329600  | 1.40803800  |
| H | 5.92843000  | -1.33617300 | 2.24395900  |
| H | 5.39140500  | 0.25558600  | 2.81096200  |

**[(hmb)Ru(Q<sup>Ph</sup>)PTA]<sup>+</sup> (7c), cation of 7**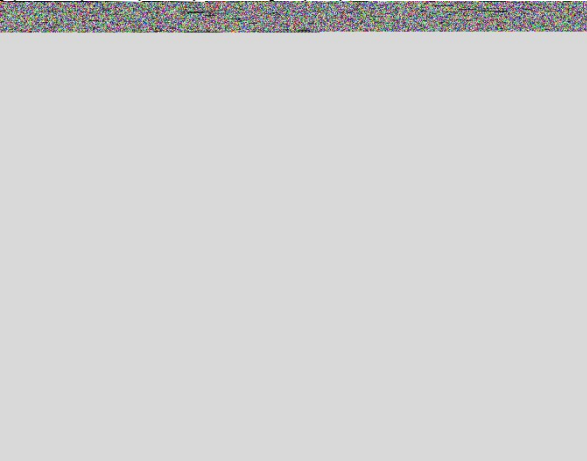

|    |             |             |             |
|----|-------------|-------------|-------------|
| Ru | -0.24878300 | -0.87463100 | 0.93185600  |
| P  | -1.65422300 | -1.03121200 | -0.97043600 |
| O  | 1.29314000  | -0.37588700 | -0.43008300 |
| O  | -0.85799400 | 1.15248500  | 0.84978000  |
| N  | 3.22951600  | 2.52021600  | -0.79732000 |
| N  | 2.98938800  | 1.15383500  | -0.89794000 |
| N  | -4.07060400 | -0.34032300 | -2.15100300 |
| N  | -2.07304500 | -0.21026500 | -3.59168500 |
| N  | -3.00444800 | -2.40711800 | -2.97386900 |
| C  | -0.95200100 | 3.45158100  | 0.46362400  |
| C  | 4.04650000  | 0.30111300  | -1.32730100 |
| C  | 2.12901000  | 3.07478900  | -0.35509500 |
| C  | 1.73536200  | 0.83072800  | -0.46528300 |
| C  | -1.02834100 | 4.28293500  | -0.66520800 |
| H  | -0.49800100 | 4.00816300  | -1.57221500 |
| C  | -1.67349600 | 3.79395500  | 1.61866700  |
| C  | -0.20243200 | 2.16508100  | 0.40534300  |
| C  | 1.10303600  | 2.07438900  | -0.12079600 |
| C  | -3.35292100 | 0.40332400  | -3.20025400 |
| H  | -3.99465300 | 0.44341900  | -4.08617600 |
| H  | -3.17413800 | 1.42769700  | -2.85818000 |
| C  | -2.42506400 | 4.96600100  | 1.65678100  |
| C  | -2.14685700 | -2.64962000 | -1.81113800 |
| H  | -1.24318600 | -3.18223500 | -2.13076300 |
| H  | -2.67629700 | -3.29320800 | -1.09956400 |
| C  | 3.78417300  | -0.96919900 | -1.85903000 |
| H  | 2.76446500  | -1.31647100 | -1.95743400 |
| C  | 2.13195800  | 4.55127000  | -0.09223000 |
| H  | 3.16269900  | 4.91052100  | -0.14059500 |
| H  | 1.71894500  | 4.78360600  | 0.89482900  |
| H  | 1.54140600  | 5.10587400  | -0.82762800 |
| C  | 4.84873500  | -1.77295700 | -2.27068100 |
| H  | 4.64105200  | -2.75422200 | -2.68857700 |
| C  | 5.36503700  | 0.76505500  | -1.22706500 |
| H  | 5.54934700  | 1.75730600  | -0.83462500 |
| C  | -1.41715500 | -2.24105600 | 2.34648300  |
| C  | -0.40556000 | -3.06026700 | 1.70855500  |
| C  | 6.16484200  | -1.32109100 | -2.16810400 |
| H  | 6.98707200  | -1.94990800 | -2.49618700 |
| C  | 6.41440900  | -0.04842000 | -1.64952600 |
| H  | 7.43374600  | 0.31848700  | -1.57179700 |
| C  | -1.80227700 | 5.44290500  | -0.63267900 |

|   |             |             |             |
|---|-------------|-------------|-------------|
| H | -1.86573800 | 6.07393800  | -1.51429900 |
| C | -3.37528000 | -0.27197000 | -0.86411900 |
| H | -3.96074800 | -0.79754700 | -0.10101300 |
| H | -3.27573700 | 0.77014600  | -0.54302700 |
| C | -2.49319000 | 5.79082900  | 0.53004400  |
| H | -3.08698200 | 6.69980500  | 0.55775300  |
| C | 0.95082200  | -2.64132900 | 1.72597100  |
| C | -1.07715200 | -0.12939900 | -2.52128800 |
| H | -0.88104500 | 0.91939500  | -2.27475000 |
| H | -0.13124100 | -0.56789400 | -2.85466800 |
| C | 1.36234700  | -1.50862600 | 2.53458800  |
| C | -4.25724100 | -1.72900600 | -2.60035900 |
| H | -4.90838800 | -1.71692700 | -3.48008300 |
| H | -4.75760900 | -2.30139400 | -1.81209100 |
| C | -2.32171400 | -1.60078100 | -4.00079800 |
| H | -1.37154700 | -2.07762900 | -4.26243900 |
| H | -2.95529200 | -1.58642400 | -4.89324600 |
| C | -1.02342100 | -1.07816700 | 3.06809100  |
| C | -2.03659100 | -0.21088900 | 3.78442100  |
| H | -3.00194300 | -0.70218200 | 3.89541100  |
| H | -2.19435500 | 0.73236000  | 3.24878400  |
| H | -1.68418900 | 0.03096100  | 4.79130500  |
| C | 0.38361000  | -0.71845900 | 3.17372400  |
| H | -2.96181700 | 5.23537000  | 2.56173700  |
| H | -1.62767300 | 3.14624300  | 2.48867700  |
| C | -2.87456000 | -2.64756300 | 2.27218400  |
| H | -3.13592300 | -3.31149500 | 3.10683400  |
| H | -3.53973900 | -1.78511000 | 2.31281900  |
| H | -3.10044200 | -3.18054900 | 1.34747600  |
| C | -0.75398200 | -4.39661200 | 1.07972900  |
| H | -0.08071800 | -5.16821400 | 1.46746600  |
| H | -1.76917600 | -4.71163000 | 1.31835400  |
| H | -0.64965900 | -4.39622300 | -0.00864500 |
| C | 2.00430000  | -3.42285600 | 0.97614600  |
| H | 2.54695900  | -4.09370700 | 1.65560800  |
| H | 1.56905400  | -4.03425300 | 0.18568400  |
| H | 2.73195200  | -2.75499800 | 0.51048600  |
| C | 2.83826600  | -1.19617300 | 2.61617300  |
| H | 3.40255500  | -2.10959100 | 2.82868900  |
| H | 3.21449300  | -0.79932300 | 1.66627000  |
| H | 3.07149200  | -0.48080300 | 3.40333100  |
| C | 0.75912900  | 0.53053400  | 3.93907800  |
| H | 0.87066900  | 0.31101400  | 5.00916800  |
| H | 1.69590200  | 0.96087300  | 3.58604500  |
| H | -0.00639500 | 1.30117300  | 3.83941100  |



**[(hmb)Ru(Q<sup>naph</sup>)(PTA)]<sup>+</sup> (8c), cation of 8**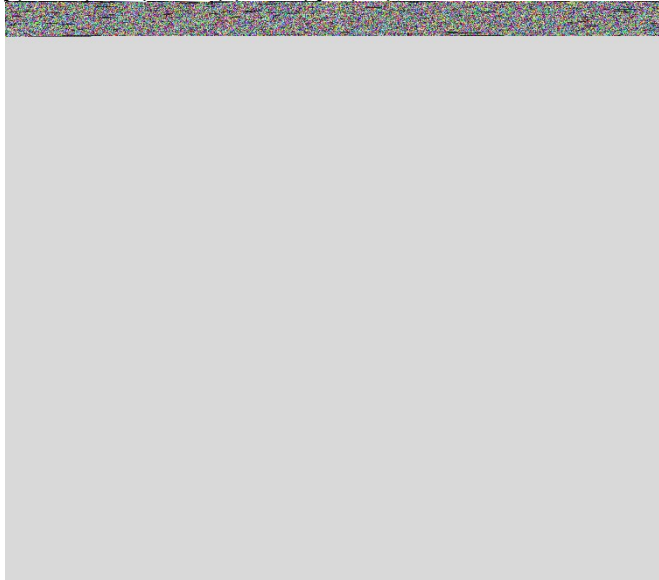

|    |             |             |             |
|----|-------------|-------------|-------------|
| Ru | -0.62950600 | 0.74843800  | 1.03555400  |
| P  | -0.35297900 | 2.10714700  | -0.87997500 |
| O  | -1.60663300 | -0.64108000 | -0.22511600 |
| O  | 1.22164900  | -0.04567200 | 0.36095300  |
| N  | -0.74414800 | -3.78423300 | -1.51184800 |
| N  | -1.64092500 | -2.79261900 | -1.12021000 |
| N  | 1.45009900  | 3.52716300  | -2.44809800 |
| N  | -0.22278200 | 2.17191700  | -3.65537700 |
| N  | -0.90105700 | 4.26258200  | -2.54416000 |
| C  | 2.85303600  | -1.29730200 | -0.77242200 |
| C  | -3.03642400 | -3.07375600 | -1.16169700 |
| C  | 0.46079700  | -3.30593000 | -1.33462400 |
| C  | -0.99431500 | -1.68542900 | -0.65283300 |
| C  | 3.14004500  | -1.25272700 | -2.12755500 |
| H  | 2.32756000  | -1.16021100 | -2.84338300 |
| C  | 3.91442500  | -1.43858600 | 0.18047500  |
| C  | 1.42938000  | -1.09272100 | -0.35598800 |
| C  | 0.41023100  | -1.96240000 | -0.78539300 |
| C  | 3.69355400  | -1.55831900 | 1.57925600  |
| H  | 2.67728300  | -1.52876200 | 1.95432300  |
| C  | 1.17570700  | 2.62860700  | -3.58259400 |
| H  | 1.40314000  | 3.16994900  | -4.50640000 |
| H  | 1.83757800  | 1.75900800  | -3.52003900 |
| C  | 5.26226800  | -1.51580300 | -0.30493600 |
| C  | -1.33697700 | 3.67166000  | -1.27822000 |
| H  | -2.40432000 | 3.42805600  | -1.33604500 |
| H  | -1.20351100 | 4.40578000  | -0.47573200 |
| C  | -3.98303900 | -2.04274200 | -1.23704400 |
| H  | -3.65982700 | -1.01097300 | -1.27394900 |
| C  | 1.63690400  | -4.18064500 | -1.64672900 |
| H  | 1.27548900  | -5.18885600 | -1.86287500 |
| H  | 2.33727600  | -4.22518600 | -0.80596000 |
| H  | 2.19815500  | -3.81894700 | -2.51401500 |
| C  | -5.34171500 | -2.36141400 | -1.27424600 |
| H  | -6.07271400 | -1.56006100 | -1.33881800 |
| C  | -3.45074800 | -4.41205500 | -1.14214100 |
| H  | -2.70556100 | -5.19694000 | -1.10501400 |
| C  | 6.32560900  | -1.67877400 | 0.62446300  |
| H  | 7.34298400  | -1.73278200 | 0.24582600  |
| C  | -0.58398100 | 2.39867300  | 2.61858100  |
| C  | -1.98081100 | 2.13743900  | 2.33826300  |
| C  | -5.76286600 | -3.69138800 | -1.24795600 |

|   |             |             |             |
|---|-------------|-------------|-------------|
| H | -6.82135300 | -3.93135500 | -1.28265100 |
| C | -4.81076400 | -4.71157200 | -1.18702800 |
| H | -5.12559600 | -5.75101300 | -1.17362400 |
| C | 4.47142400  | -1.31545600 | -2.59676900 |
| H | 4.66650800  | -1.26603800 | -3.66375900 |
| C | 1.36688900  | 2.82216100  | -1.16704900 |
| H | 1.61381800  | 3.51146400  | -0.35096600 |
| H | 2.09295200  | 2.00415100  | -1.13624400 |
| C | 5.50905200  | -1.44028500 | -1.70191500 |
| H | 6.53599000  | -1.49195100 | -2.05409400 |
| C | -2.46480000 | 0.80285300  | 2.37700100  |
| C | 6.07736300  | -1.77933200 | 1.97395100  |
| H | 6.89771600  | -1.91010800 | 2.67331000  |
| C | -0.56428800 | 1.26774400  | -2.55518700 |
| H | 0.07173300  | 0.37779100  | -2.59414500 |
| H | -1.60082600 | 0.93007200  | -2.65735300 |
| C | 4.74624700  | -1.72609900 | 2.45231500  |
| H | 4.55676800  | -1.82780700 | 3.51757200  |
| C | -1.63837700 | -0.25168400 | 2.93816300  |
| C | 0.51644800  | 4.66155500  | -2.50863700 |
| H | 0.72823000  | 5.22972400  | -3.41991100 |
| H | 0.68699100  | 5.31780500  | -1.64871600 |
| C | -1.10347000 | 3.34823600  | -3.68159700 |
| H | -2.14774800 | 3.02007700  | -3.70163800 |
| H | -0.90150500 | 3.90635900  | -4.60126300 |
| C | 0.26597900  | 1.33347300  | 3.03677700  |
| C | 1.72745100  | 1.56556700  | 3.34943900  |
| H | 2.05508200  | 2.57207400  | 3.09643800  |
| H | 2.36533800  | 0.86568600  | 2.80197300  |
| H | 1.91236200  | 1.42647700  | 4.42157500  |
| C | -0.29718300 | 0.01261400  | 3.27469700  |
| C | -3.87286800 | 0.46265800  | 1.94523300  |
| H | -3.90771800 | -0.51689700 | 1.46635000  |
| H | -4.55226400 | 0.44291800  | 2.80778200  |
| H | -4.26323600 | 1.18250100  | 1.22557600  |
| C | -2.24412700 | -1.62433700 | 3.11166100  |
| H | -3.20480900 | -1.55371400 | 3.63223600  |
| H | -2.43718000 | -2.09461300 | 2.14078700  |
| H | -1.60461700 | -2.29117000 | 3.68797600  |
| C | 0.55843100  | -1.08952400 | 3.86320400  |
| H | 0.18032500  | -1.36553700 | 4.85530200  |
| H | 0.54198400  | -1.99151100 | 3.24518400  |
| H | 1.59670900  | -0.78864700 | 3.98517700  |
| C | -0.06977400 | 3.82178400  | 2.54265400  |
| H | -0.04578100 | 4.26850800  | 3.54543500  |
| H | 0.94145000  | 3.87719300  | 2.13787600  |
| H | -0.70533200 | 4.45370200  | 1.92198900  |
| C | -2.92028600 | 3.29929400  | 2.08107700  |
| H | -2.79005900 | 4.04879400  | 2.86934300  |
| H | -2.74756300 | 3.80133700  | 1.12583300  |
| H | -3.96397400 | 2.98929700  | 2.10722400  |

**[(hmb)Ru(Q<sup>naph</sup>)(PTA)]<sup>+</sup> (i8c), Isomer cation of 8**

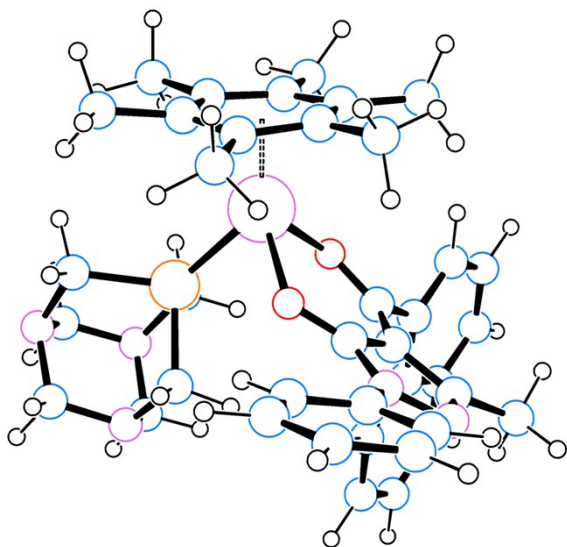

|    |             |             |             |
|----|-------------|-------------|-------------|
| Ru | 1.13966800  | -0.84118200 | 0.81914100  |
| P  | 0.18946400  | -1.95033000 | -1.05209700 |
| O  | 1.33484800  | 0.85116300  | -0.43984900 |
| O  | -0.86863400 | -0.26031500 | 1.14977200  |
| N  | -0.18643400 | 4.00987300  | -0.46622800 |
| N  | 0.83681100  | 3.10801400  | -0.75110200 |
| N  | -2.03741800 | -3.25240500 | -2.08691000 |
| N  | -0.88889800 | -1.67844200 | -3.60028900 |
| N  | 0.13823200  | -3.85620700 | -3.07625300 |
| C  | -2.86501600 | 0.92609600  | 1.33254200  |
| C  | 2.03341700  | 3.59727900  | -1.34886900 |
| C  | -1.14193100 | 3.33557800  | 0.12053300  |
| C  | 0.53953300  | 1.85141800  | -0.30783600 |
| C  | -3.12709200 | 0.77089700  | 2.68349000  |
| H  | -2.29695300 | 0.67429800  | 3.37728600  |
| C  | -3.94816000 | 1.03555100  | 0.39764900  |
| C  | -1.43502700 | 0.86336400  | 0.88884600  |
| C  | -0.77570000 | 1.93881100  | 0.26778300  |
| C  | -3.76918600 | 1.16077700  | -1.00935400 |
| H  | -2.76422400 | 1.21830200  | -1.41424900 |
| C  | -2.17573400 | -2.20913800 | -3.11682600 |
| H  | -2.70397300 | -2.64462600 | -3.97100600 |
| H  | -2.78157300 | -1.38900700 | -2.71895200 |
| C  | -5.29037500 | 0.99309500  | 0.90743500  |
| C  | 0.97867100  | -3.40283900 | -1.96623400 |
| H  | 1.95973200  | -3.10216100 | -2.35213000 |
| H  | 1.13311600  | -4.23562700 | -1.27074300 |
| C  | 2.88250000  | 2.75037400  | -2.07420600 |
| H  | 2.63213800  | 1.70494400  | -2.19615300 |
| C  | -2.37496500 | 4.06093800  | 0.56384600  |
| H  | -2.21746700 | 5.13416800  | 0.43312400  |
| H  | -2.60284300 | 3.85904100  | 1.61573500  |
| H  | -3.25045600 | 3.76372900  | -0.02231100 |
| C  | 4.04484300  | 3.27161500  | -2.64511400 |
| H  | 4.69806300  | 2.61397400  | -3.21208500 |
| C  | 2.34062900  | 4.95772200  | -1.21378000 |
| H  | 1.66263400  | 5.60217200  | -0.66813500 |
| C  | -6.38169000 | 1.07822000  | -0.00021000 |
| H  | -7.39185900 | 1.04588900  | 0.39962900  |
| C  | 1.93366300  | -2.67657900 | 1.94592500  |
| C  | 3.03046600  | -2.14437000 | 1.16174300  |
| C  | 4.36127500  | 4.62394100  | -2.51000900 |
| H  | 5.26438700  | 5.02273400  | -2.96225100 |

|   |             |             |             |
|---|-------------|-------------|-------------|
| C | 3.50119800  | 5.46209300  | -1.79678800 |
| H | 3.73226600  | 6.51806800  | -1.69073500 |
| C | -4.44891600 | 0.75991500  | 3.17793400  |
| H | -4.62292200 | 0.66319000  | 4.24532300  |
| C | -1.52234400 | -2.71115200 | -0.82751000 |
| H | -1.46941000 | -3.51054100 | -0.07884800 |
| H | -2.20021000 | -1.94581000 | -0.43875900 |
| C | -5.50742700 | 0.86483300  | 2.30470500  |
| H | -6.52950500 | 0.84766200  | 2.67391900  |
| C | 3.36112600  | -0.76514700 | 1.26831600  |
| C | -6.17149700 | 1.19944500  | -1.35405000 |
| H | -7.01384800 | 1.26569900  | -2.03603100 |
| C | -0.19654600 | -0.90061400 | -2.57049200 |
| H | -0.81585200 | -0.05044800 | -2.26802100 |
| H | 0.73776000  | -0.49436000 | -2.97192400 |
| C | -4.85037700 | 1.24330400  | -1.86029900 |
| H | -4.68810100 | 1.35054600  | -2.92918500 |
| C | 2.75040500  | 0.05074700  | 2.30370200  |
| C | -1.17976000 | -4.32421900 | -2.61262700 |
| H | -1.69115600 | -4.78433100 | -3.46410400 |
| H | -1.04142500 | -5.09028300 | -1.84232300 |
| C | -0.06559600 | -2.79797700 | -4.08046600 |
| H | 0.90738500  | -2.41822200 | -4.40907500 |
| H | -0.56785500 | -3.24631000 | -4.94351900 |
| C | 1.23785300  | -1.83439400 | 2.85912000  |
| C | 0.07832800  | -2.35277200 | 3.68058500  |
| H | -0.12294800 | -3.40680800 | 3.49923400  |
| H | -0.83698800 | -1.79553100 | 3.45568100  |
| H | 0.28892500  | -2.24238500 | 4.75025700  |
| C | 1.68695900  | -0.46748900 | 3.06980000  |
| C | 4.40031700  | -0.12690700 | 0.37444800  |
| H | 4.13415400  | 0.90586200  | 0.14512000  |
| H | 5.38692500  | -0.12697900 | 0.85635900  |
| H | 4.49045700  | -0.64747900 | -0.57912900 |
| C | 3.24416900  | 1.46550600  | 2.50005900  |
| H | 4.33699800  | 1.49449600  | 2.46612500  |
| H | 2.87838000  | 2.13281800  | 1.71094400  |
| H | 2.93537500  | 1.87577600  | 3.46124800  |
| C | 0.98855000  | 0.40998400  | 4.08572800  |
| H | 1.59978300  | 0.50243100  | 4.99300100  |
| H | 0.81835900  | 1.41655500  | 3.69731000  |
| H | 0.02287900  | 0.00501200  | 4.38391100  |
| C | 1.57415300  | -4.14538100 | 1.83912300  |
| H | 1.93093500  | -4.68469300 | 2.72605400  |
| H | 0.49556300  | -4.30196400 | 1.77461200  |
| H | 2.02801300  | -4.61951300 | 0.96982600  |
| C | 3.85168400  | -3.08400700 | 0.30267300  |
| H | 4.27687900  | -3.87025100 | 0.93786700  |
| H | 3.26478900  | -3.57753900 | -0.47497400 |
| H | 4.68616000  | -2.57925100 | -0.18047800 |

### Transition state of the naphthyl rotation in [(cym)Ru(Q<sup>naph</sup>)PTA]<sup>+</sup> (6c)

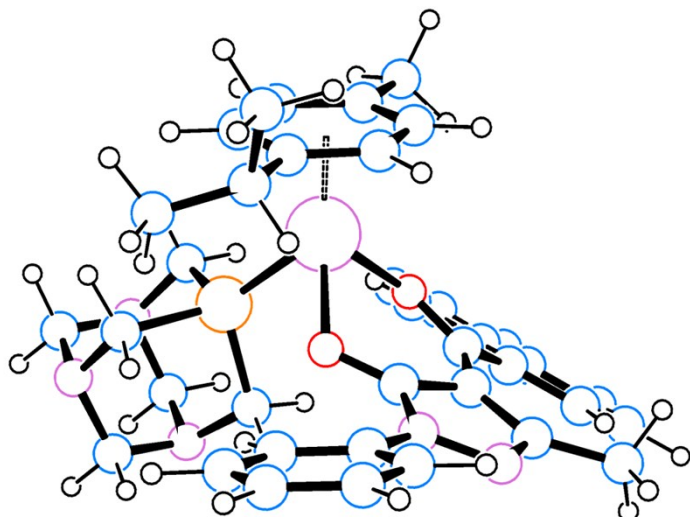

|    |             |             |             |
|----|-------------|-------------|-------------|
| Ru | 0.41973100  | -0.56476600 | 1.21164400  |
| P  | -0.34857000 | -2.03324000 | -0.48629600 |
| O  | 1.30647600  | 0.35578200  | -0.43622800 |
| O  | -1.18767100 | 0.67128500  | 0.69181000  |
| N  | 1.67755500  | 3.74214200  | -1.12187000 |
| N  | 2.08162800  | 2.43109900  | -1.07634600 |
| N  | -1.98289300 | -4.07940900 | -1.39844600 |
| N  | -1.49198200 | -2.26844600 | -3.00055000 |
| N  | 0.24890400  | -3.91790300 | -2.43370200 |
| C  | -2.67154900 | 2.31737500  | -0.01318600 |
| C  | 3.42253700  | 2.10912000  | -1.43734000 |
| C  | 0.43118100  | 3.79009100  | -0.70950100 |
| C  | 1.10365600  | 1.62605300  | -0.57551500 |
| C  | -2.87734700 | 3.66676500  | -0.25757300 |
| H  | -2.02950700 | 4.31786000  | -0.31343600 |
| C  | -3.84441700 | 1.45520800  | 0.09367000  |
| C  | -1.26580600 | 1.82240000  | 0.13239700  |
| C  | -0.05015400 | 2.45795600  | -0.33596900 |
| C  | -3.84267600 | 0.05435800  | 0.35837600  |
| H  | -2.90561100 | -0.43982100 | 0.54924100  |
| C  | -2.49912200 | -3.19422600 | -2.45968700 |
| H  | -2.85727500 | -3.82577900 | -3.27871000 |
| H  | -3.34577000 | -2.61973600 | -2.07107900 |
| C  | -5.14003300 | 2.05814800  | -0.10325700 |
| C  | 0.89096000  | -3.14915600 | -1.36666900 |
| H  | 1.69237200  | -2.52946800 | -1.78448700 |
| H  | 1.34511100  | -3.83615600 | -0.64304800 |
| C  | 3.75881900  | 0.84399000  | -1.93531100 |
| H  | 2.99291800  | 0.09017200  | -2.05823500 |
| C  | -0.11859200 | 5.19205300  | -0.64194600 |
| H  | 0.71721200  | 5.87226500  | -0.82115000 |
| H  | -0.54558600 | 5.43291800  | 0.33775200  |
| H  | -0.87200600 | 5.39284700  | -1.41153700 |
| C  | 5.08375500  | 0.57392000  | -2.28261500 |
| H  | 5.34014300  | -0.40575700 | -2.67651300 |
| C  | 4.40365100  | 3.10096300  | -1.30864100 |
| H  | 4.12114900  | 4.08146700  | -0.94515900 |
| C  | -6.32047200 | 1.26858500  | -0.04702900 |
| H  | -7.27504300 | 1.76333900  | -0.20549900 |
| C  | 0.31216300  | -2.04816500 | 2.93832000  |
| H  | -0.27680400 | -2.95924100 | 2.96290700  |
| C  | 1.64061600  | -2.08646700 | 2.39866900  |
| H  | 2.02839300  | -3.02449600 | 2.02024500  |

|   |             |             |             |
|---|-------------|-------------|-------------|
| C | 6.06844300  | 1.55391100  | -2.15008500 |
| H | 7.09542700  | 1.33914100  | -2.43016400 |
| C | 5.71989100  | 2.81761800  | -1.66739100 |
| H | 6.47562600  | 3.59146600  | -1.56891800 |
| C | -4.14838500 | 4.24654100  | -0.41380200 |
| H | -4.23241200 | 5.31406500  | -0.59180300 |
| C | -1.67076900 | -3.34119500 | -0.17321600 |
| H | -1.32307400 | -4.04058600 | 0.59682800  |
| H | -2.57597300 | -2.85498200 | 0.20690200  |
| C | -5.26311100 | 3.44989400  | -0.34943400 |
| H | -6.25644300 | 3.87037700  | -0.48216400 |
| C | 2.42523900  | -0.91570800 | 2.31004400  |
| C | -6.26772000 | -0.08189600 | 0.20081700  |
| H | -7.17608700 | -0.67507500 | 0.24278300  |
| C | -1.10924700 | -1.24994000 | -2.02059500 |
| H | -1.98717200 | -0.66560200 | -1.72996900 |
| H | -0.37697100 | -0.56285900 | -2.45619100 |
| C | -5.00987300 | -0.68353100 | 0.40763200  |
| H | -4.95712900 | -1.74863000 | 0.62116700  |
| C | 1.85399800  | 0.30621600  | 2.82010500  |
| H | 2.42127300  | 1.22775900  | 2.73684900  |
| C | -0.80809300 | -4.80124000 | -1.91480200 |
| H | -1.14032600 | -5.44769700 | -2.73303100 |
| H | -0.39524800 | -5.43546900 | -1.12322400 |
| C | -0.33388600 | -3.04446100 | -3.46777700 |
| H | 0.43528300  | -2.36035400 | -3.83991100 |
| H | -0.66044500 | -3.67845400 | -4.29811100 |
| C | -0.25938100 | -0.84472700 | 3.40185600  |
| C | -1.65902900 | -0.77533000 | 3.94973400  |
| H | -2.21168700 | -1.69753500 | 3.75123800  |
| H | -2.21065400 | 0.05933100  | 3.50592300  |
| H | -1.63344500 | -0.62334000 | 5.03584200  |
| C | 0.55846900  | 0.33932500  | 3.34519300  |
| H | 0.13119100  | 1.28824300  | 3.65547900  |
| C | 3.83957500  | -0.88343000 | 1.75547300  |
| H | 3.90668700  | 0.01711600  | 1.13199800  |
| C | 4.20333800  | -2.08443500 | 0.87506800  |
| H | 3.49336700  | -2.21120400 | 0.05147500  |
| H | 4.24778800  | -3.01764800 | 1.44957100  |
| H | 5.19345800  | -1.92711100 | 0.43701000  |
| C | 4.84040600  | -0.73309400 | 2.92385300  |
| H | 5.85684800  | -0.63396500 | 2.52983000  |
| H | 4.81507300  | -1.61093600 | 3.57994100  |
| H | 4.63061300  | 0.15199400  | 3.53401200  |

### Proligand HQ<sup>Ph</sup>

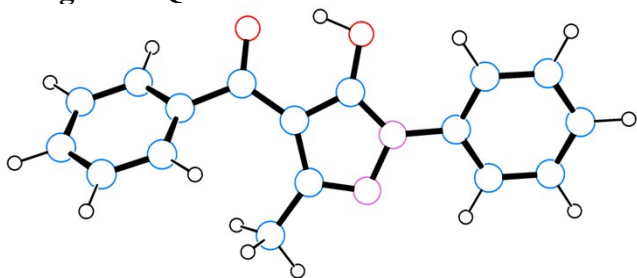

|   |             |             |             |
|---|-------------|-------------|-------------|
| O | -1.00768600 | -2.02808400 | 0.06452000  |
| O | 1.55059300  | -2.18463700 | -0.18937500 |
| C | 3.07569900  | -0.39989700 | 0.00582900  |
| N | -1.70447800 | 0.23120200  | -0.00711900 |
| C | -3.12328200 | 0.12207800  | 0.02321300  |
| C | -3.88826700 | 1.21997000  | -0.38985900 |
| H | -3.38423100 | 2.11941800  | -0.72000200 |
| C | 0.18565300  | 1.29225600  | -0.16712900 |
| C | 5.39832100  | -0.56091600 | -0.66994200 |
| C | 4.08185400  | -1.00368700 | -0.76400200 |
| N | -1.11859800 | 1.48422600  | -0.14031500 |
| C | 4.74028200  | 1.04767500  | 1.01288900  |
| H | 4.99871500  | 1.82916600  | 1.72212500  |
| C | 3.41651100  | 0.62174600  | 0.90224500  |
| H | 2.65209200  | 1.05578600  | 1.53852600  |
| C | -0.75530000 | -0.73017000 | 0.01632400  |
| C | 1.68859500  | -0.94186300 | -0.08403900 |
| C | 0.50750500  | -0.10607700 | -0.05063600 |
| C | -3.74915400 | -1.04932400 | 0.46800700  |
| H | -3.15969000 | -1.89553200 | 0.79503100  |
| C | 1.07036200  | 2.48821900  | -0.35755000 |
| H | 0.46184100  | 3.32170800  | -0.71750200 |
| H | 1.86615100  | 2.28719600  | -1.08116700 |
| H | 1.55072500  | 2.80010300  | 0.57618300  |
| C | -5.14234400 | -1.11480600 | 0.48245700  |
| H | -5.62326800 | -2.02631800 | 0.82658800  |
| C | -5.27824700 | 1.13799500  | -0.36102800 |
| H | -5.86628100 | 1.99325800  | -0.68268300 |
| C | -5.91368000 | -0.02783900 | 0.07093700  |
| H | -6.99821200 | -0.08734500 | 0.08837300  |
| C | 5.73001200  | 0.46589000  | 0.21890800  |
| H | 6.75954100  | 0.80445700  | 0.29878800  |
| H | -0.08971500 | -2.43612600 | -0.04151400 |
| H | 6.16905600  | -1.02151200 | -1.28183400 |
| H | 3.81443200  | -1.81799800 | -1.42978100 |

### Proligand HQ<sup>naph</sup>

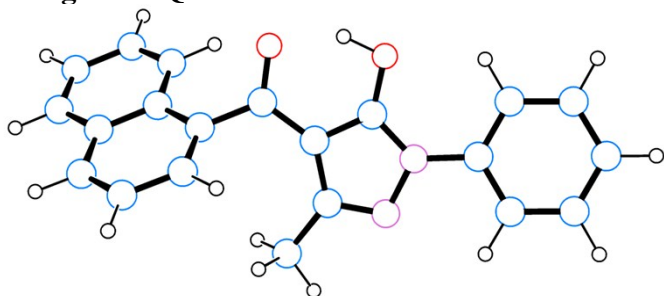

|   |             |             |             |
|---|-------------|-------------|-------------|
| O | 1.72322900  | -1.72961300 | -0.96997900 |
| O | -0.85836300 | -1.66746100 | -1.04571600 |
| C | -2.19360400 | 0.23508900  | -0.55438100 |
| N | 2.56008900  | 0.19808800  | 0.12420000  |
| C | 3.96830200  | -0.01404200 | 0.12764200  |
| C | 4.80148100  | 1.05205300  | 0.49041700  |
| H | 4.35576900  | 2.00088900  | 0.76008300  |
| C | 0.73881500  | 1.31028000  | 0.54532600  |
| C | -4.60385400 | 0.37643400  | -0.06250900 |
| C | -3.37694700 | -0.36642200 | -0.00736200 |
| N | 2.04593200  | 1.35107500  | 0.70945600  |
| C | -3.47877800 | 2.19733400  | -1.21801700 |
| H | -3.50344900 | 3.16981300  | -1.70130700 |
| C | -2.26077500 | 1.48631100  | -1.14158400 |
| H | -1.36398500 | 1.91567800  | -1.57826900 |
| C | 1.55865200  | -0.55540800 | -0.38192300 |
| C | -0.89013100 | -0.49682400 | -0.59472100 |
| C | 0.34226800  | 0.12239400  | -0.16274300 |
| C | 4.51946100  | -1.25527200 | -0.21674200 |
| H | 3.87972500  | -2.08230400 | -0.49268500 |
| C | -0.08842900 | 2.41080900  | 1.13799500  |
| H | 0.54774700  | 3.02132900  | 1.78377100  |
| H | -0.91774900 | 2.01012100  | 1.72990400  |
| H | -0.52470000 | 3.05816300  | 0.37043600  |
| C | -3.39046800 | -1.64640500 | 0.61238300  |
| H | -2.47667100 | -2.22714700 | 0.64226300  |
| C | -5.78189800 | -0.18471400 | 0.49995300  |
| H | -6.70453300 | 0.38882300  | 0.45200800  |
| C | 5.90522800  | -1.41398100 | -0.20116500 |
| H | 6.32691100  | -2.37858600 | -0.47016900 |
| C | 6.18228700  | 0.87188400  | 0.50455600  |
| H | 6.82179600  | 1.70364500  | 0.78728200  |
| C | 6.74343300  | -0.35848500 | 0.15748000  |
| H | 7.82132400  | -0.49291100 | 0.16752000  |
| C | -4.62271000 | 1.65493900  | -0.68159400 |
| H | -5.56411500 | 2.19737900  | -0.72712200 |
| C | -4.55089700 | -2.15862500 | 1.14896800  |
| H | -4.53950500 | -3.13960900 | 1.61615000  |
| C | -5.75935600 | -1.42472800 | 1.09426500  |
| H | -6.66638700 | -1.84400100 | 1.52097200  |
| H | 0.77426300  | -2.02456000 | -1.14834600 |



### Rotamer of the proligand HQ<sup>naph</sup>

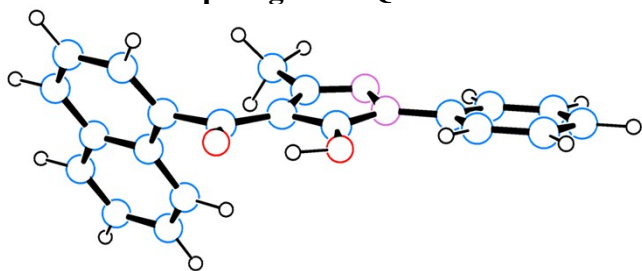

|   |             |             |             |
|---|-------------|-------------|-------------|
| O | -1.85336300 | 1.81522200  | -1.13448100 |
| O | 0.67665400  | 2.35656300  | -1.02198100 |
| C | 2.32505600  | 1.06409100  | 0.08107500  |
| N | -2.35344000 | -0.05291700 | 0.23916500  |
| C | -3.76431400 | -0.19120800 | 0.10550200  |
| C | -4.37369100 | -1.34091500 | 0.62454500  |
| H | -3.76076500 | -2.08704200 | 1.11357800  |
| C | -0.38611000 | -0.60375600 | 0.98740900  |
| C | 4.39326900  | -0.27323200 | 0.08696700  |
| C | 3.03383100  | -0.10567300 | -0.34249400 |
| N | -1.65832000 | -0.93893100 | 1.05975400  |
| C | 4.29695300  | 1.84655900  | 1.27357900  |
| H | 4.76711600  | 2.60721700  | 1.89024900  |
| C | 2.96327300  | 2.02457600  | 0.84437800  |
| H | 2.42200300  | 2.92360500  | 1.12381500  |
| C | -1.49927100 | 0.82964900  | -0.32506100 |
| C | 0.90631300  | 1.34150800  | -0.32385900 |
| C | -0.19544000 | 0.51699200  | 0.10772700  |
| C | -4.53670800 | 0.79399800  | -0.52389700 |
| H | -4.07141000 | 1.68555300  | -0.92144000 |
| C | 0.61507300  | -1.36422400 | 1.80020000  |
| H | 0.08745800  | -2.04821100 | 2.46955000  |
| H | 1.23521800  | -0.68762700 | 2.39791400  |
| H | 1.29020900  | -1.94504300 | 1.16316400  |
| C | 2.47119200  | -1.09118100 | -1.20129500 |
| H | 1.45279300  | -0.96751500 | -1.55587000 |
| C | 5.11485900  | -1.42379200 | -0.33211400 |
| H | 6.14284800  | -1.54171300 | 0.00233900  |
| C | -5.91543100 | 0.61301000  | -0.63389300 |
| H | -6.50870900 | 1.38017900  | -1.12391400 |
| C | -5.75224100 | -1.50059300 | 0.50855800  |
| H | -6.21726500 | -2.39512500 | 0.91391700  |
| C | -6.53147900 | -0.52873600 | -0.12183400 |
| H | -7.60612200 | -0.65952800 | -0.21158300 |
| C | 4.99333100  | 0.71789600  | 0.90782500  |
| H | 6.02090300  | 0.57372900  | 1.23298300  |
| C | 3.20134000  | -2.19164500 | -1.59216900 |
| H | 2.75227000  | -2.93073600 | -2.24992000 |
| C | 4.53496700  | -2.36506900 | -1.15037000 |
| H | 5.09895000  | -3.23839000 | -1.46595000 |
| H | -0.97812000 | 2.28978500  | -1.30424400 |

## Transition state of the naphthyl rotation in the proligand HQ<sup>naph</sup>

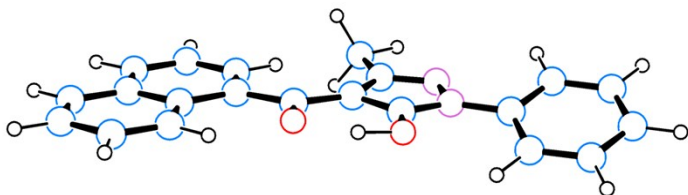

|   |             |             |             |
|---|-------------|-------------|-------------|
| O | -1.57729900 | -1.78867400 | -0.08717800 |
| O | 0.86794300  | -1.53208500 | -0.16015200 |
| C | 2.26177400  | 0.35766700  | -0.00846900 |
| N | -2.66683600 | 0.27104000  | 0.04165100  |
| C | -4.03434800 | -0.12701000 | 0.02666900  |
| C | -4.99603900 | 0.81576000  | -0.35773400 |
| H | -4.67649200 | 1.81320200  | -0.63238500 |
| C | -1.03890800 | 1.70770800  | 0.04935300  |
| C | 4.74226700  | 0.31048900  | 0.02598400  |
| C | 3.49683500  | -0.41468900 | -0.02479400 |
| N | -2.35395800 | 1.61149300  | 0.07480300  |
| C | 3.57519700  | 2.43297000  | 0.10878400  |
| H | 3.57397600  | 3.51789400  | 0.15978400  |
| C | 2.35331100  | 1.73706100  | 0.05970700  |
| H | 1.45138500  | 2.31545200  | 0.07440000  |
| C | -1.54170600 | -0.47228800 | -0.01953300 |
| C | 0.90561500  | -0.27690700 | -0.06360700 |
| C | -0.41032100 | 0.39430800  | -0.00898000 |
| C | -4.42214300 | -1.41912200 | 0.40194700  |
| H | -3.68112300 | -2.14536800 | 0.70694300  |
| C | -0.54432600 | 3.12920200  | 0.08058400  |
| H | -1.42423700 | 3.77676700  | 0.09633900  |
| H | 0.04905900  | 3.38968700  | -0.80301200 |
| H | 0.04959100  | 3.35155600  | 0.97427500  |
| C | 3.59179500  | -1.83543800 | -0.08269600 |
| H | 2.68609200  | -2.41665100 | -0.12092200 |
| C | 5.98035200  | -0.38613500 | 0.01303300  |
| H | 6.89766600  | 0.19656600  | 0.05175600  |
| C | -5.77447100 | -1.76022400 | 0.37510100  |
| H | -6.07006300 | -2.76465600 | 0.66559500  |
| C | -6.34221300 | 0.45928500  | -0.37063600 |
| H | -7.08304900 | 1.19569600  | -0.67001400 |
| C | -6.73974500 | -0.82937300 | -0.00889800 |
| H | -7.79071600 | -1.10386600 | -0.02431800 |
| C | 4.75117000  | 1.72762600  | 0.09118400  |
| H | 5.70904500  | 2.24118000  | 0.12777300  |
| C | 4.81266900  | -2.47879600 | -0.09222300 |
| H | 4.83551700  | -3.56458300 | -0.13675800 |
| C | 6.02397100  | -1.75800100 | -0.04564200 |
| H | 6.97580800  | -2.28182500 | -0.05513000 |
| H | -0.58647200 | -2.01727100 | -0.14567400 |
